# Supplementary material
Source: publisher site journal article supplement (https://www.dovepress.com/get_supplementary_file.php?f=377575.docx)
Supplement: Supplementary file 1 [file get_supplementary_file.php]

**Supporting Information**

**Rapid identification of bacteria in urinary tract infections via a fluorescence sensor array**

Lei Zhang,1, * Bing Wang,2, * Guo Yin,2 Jue Wang,2 Ming He,3 Yuqi Yang,4 Tiejie Wang,2 Ting Tang,3 Xie-an Yu,2 Jiangwei Tian1

1State Key Laboratory of Natural Medicines, Jiangsu Key Laboratory of TCM Evaluation and Translational Research, School of Traditional Chinese Pharmacy, China Pharmaceutical University, Nanjing, Jiangsu Province, 211198, People’s Republic of China; 2NMPA Key Laboratory for Bioequivalence Research of Generic Drug Evaluation, Shenzhen Institute for Drug Control, Shenzhen, Guangdong Province, 518057, People’s Republic of China; 3Dermatology Department, The First Affiliated Hospital of Guizhou University of Traditional Chinese Medicine, Guiyang, Guizhou Province, 550002, People’s Republic of China; 4School of Basic Medicine, Guizhou University of Traditional Chinese Medicine, Guiyang, Guizhou Province, 550002, People’s Republic of China

* These authors contributed equally to this work.

Correspondence: Xie-an Yu, Email [yuxieanalj@126.com](mailto:yuxieanalj@126.com); Jiangwei Tian, Email [jwtian@cpu.edu.cn](mailto:jwtian@cpu.edu.cn)

**Content**

**Fig. S1.** The DLS of Ami-AuNPs

**Fig. S2.** The DLS of Ami-AuNPs-DNAs

**Fig. S3.** The zeta potential of AuNPs

**Fig. S4.** The zeta potential of Ami-AuNPs

**Fig. S5.** The zeta potential of Ami-AuNPs-DNAs

**Fig. S6.** The stability of size for Ami-AuNPs

**Fig. S7.** The stability of zeta potential for Ami-AuNPs

**Fig. S8.** The stability of size for Ami-AuNPs-DNAs

**Fig. S9.** The stability of zeta potential for Ami-AuNPs-DNAs

**Fig. S10.** The fluorescence lifetime of DNAs and Ami-AuNPs-DNAs

**Fig. S11.** 3D canonical score plot for the response patterns of five kinds of bacteria (OD600=0.1) by PCA. Each point represents the response pattern for single bacteria species to the sensor.

**Fig. S12.** Canonical score plot for the response patterns of five kinds of bacteria (OD600=0.1) by LDA. Each point represents the response pattern for single bacteria species to the sensor.

**Fig. S13.** 2D LDA canonical score plots (A) and 3D PCA canonical score plots (B) obtained from the Ami-AuNP-DNAs sensor against *Escherichia coli* at different concentrations (OD600 from 0.005 to 0.1). Each point represents the response pattern for single bacteria to the array.

**Fig. S14.** 2D LDA canonical score plots (A) and 3D PCA canonical score plots (B) obtained from the Ami-AuNP-DNAs sensor against *Enterococcus faecium* at different concentrations (OD600 from 0.005 to 0.1). Each point represents the response pattern for single bacteria to the array.

**Fig. S15.** 2D LDA canonical score plots (A) and 3D PCA canonical score plots (B) obtained from the Ami-AuNP-DNAs sensor against *Klebsiella pneumoniae* at different concentrations (OD600 from 0.005 to 0.1). Each point represents the response pattern for single bacteria to the array.

**Fig. S16.** 2D LDA canonical score plots (A) and 3D PCA canonical score plots (B) obtained from the Ami-AuNP-DNAs sensor against *Enterococcus faecalis* at different concentrations (OD600 from 0.005 to 0.1). Each point represents the response pattern for single bacteria to the array.

**Fig. S17.** 2D LDA canonical score plots (A) and 3D PCA canonical score plots (B) obtained from the Ami-AuNP-DNAs sensor against *Pseudomonas aeruginosa* at different concentrations (OD600 from 0.005 to 0.1). Each point represents the response pattern for single bacteria to the array.

**Fig. S18.** 2D canonical score plot for the response patterns of five kinds of bacteria isolated from urine samples of clinical urinary tract infections (OD600=0.1) by PCA. Each point represents the response pattern for single bacteria species to the sensor.

**Table S1.** Zeta potential of bacteria used in this article.

**Table S2.** The fluorescence response pattern of six DNAs in five kinds of bacteria

**Table S3.** Classification results and model performance of five kinds of bacteria detection and discrimination

**Table S4.** Fluorescence response pattern obtained from the Ami-AuNP-DNAs sensoragainst *Escherichia coli* at different concentrations (OD600 from 0.005 to 0.1).

**Table S5.** Fluorescence response pattern obtained from the Ami-AuNP-DNAs sensoragainst *Enterococcus Faecium* at different concentrations (OD600 from 0.005 to 0.1).

**Table S6.** Fluorescence response pattern obtained from the Ami-AuNP-DNAs sensoragainst *Klebsiella pneumoniae* at different concentrations (OD600 from 0.005 to 0.1).

**Table S7.** Fluorescence response pattern obtained from the Ami-AuNP-DNAs sensoragainst *Enterococcus faecalis* at different concentrations (OD600 from 0.005 to 0.1).

**Table S8.** Fluorescence response pattern obtained from the Ami-AuNP-DNAs sensoragainst *Pseudomonas aeruginosa* at different concentrations (OD600 from 0.005 to 0.1).

**Table S9.** The fluorescence response pattern of six DNAs in bacteria isolated from clinical urine samples

**Table S10.** Classification results and model performance of five kinds of bacteria isolated from clinical urine samples





**Fig. S1.** The DLS of Ami-AuNPs





**Fig. S2.** The DLS of Ami-AuNPs-DNAs





**Fig. S3.** The zeta potential of AuNPs





**Fig. S4.** The zeta potential of Ami-AuNPs





**Fig. S5.** The zeta potential of Ami-AuNPs-DNAs





**Fig. S6.** The stability of size for Ami-AuNPs





**Fig. S7.** The stability of zeta potential for Ami-AuNPs





**Fig. S8.** The stability of size for Ami-AuNPs-DNAs





**Fig. S9.** The stability of zeta potential for Ami-AuNPs-DNAs


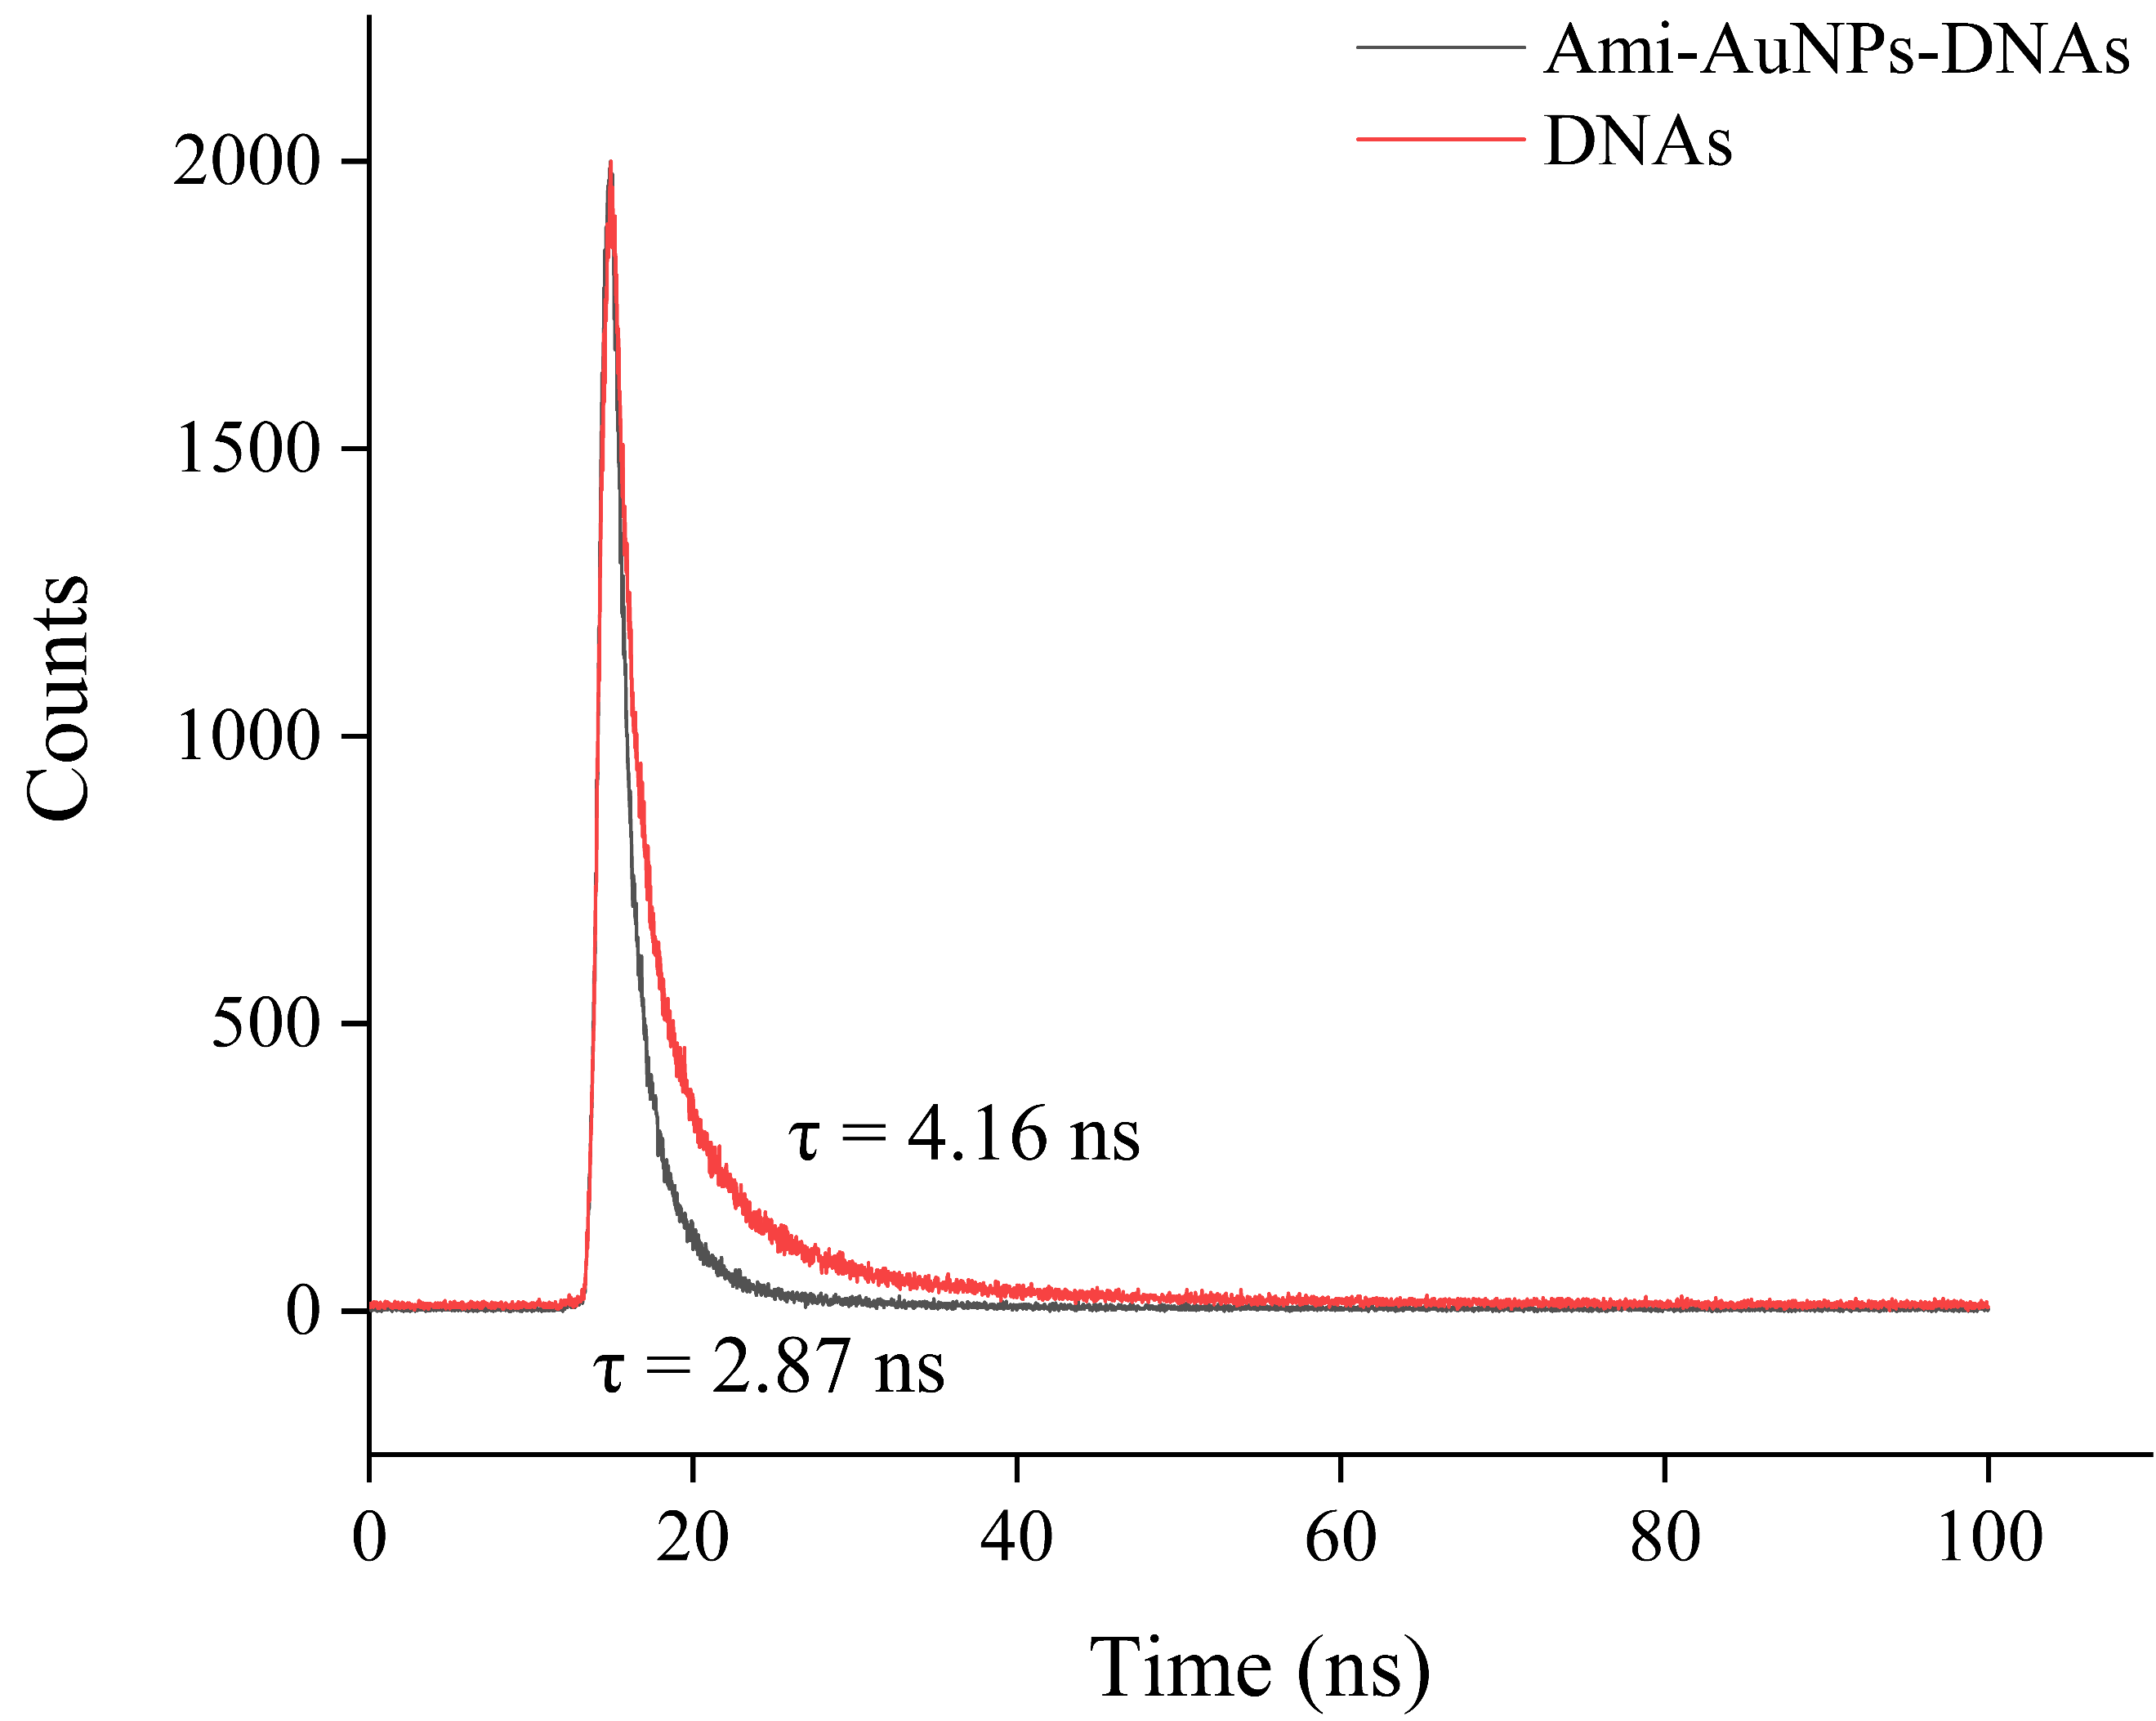


**Fig. S10.** The fluorescence lifetime of DNAs and Ami-AuNPs-DNAs.


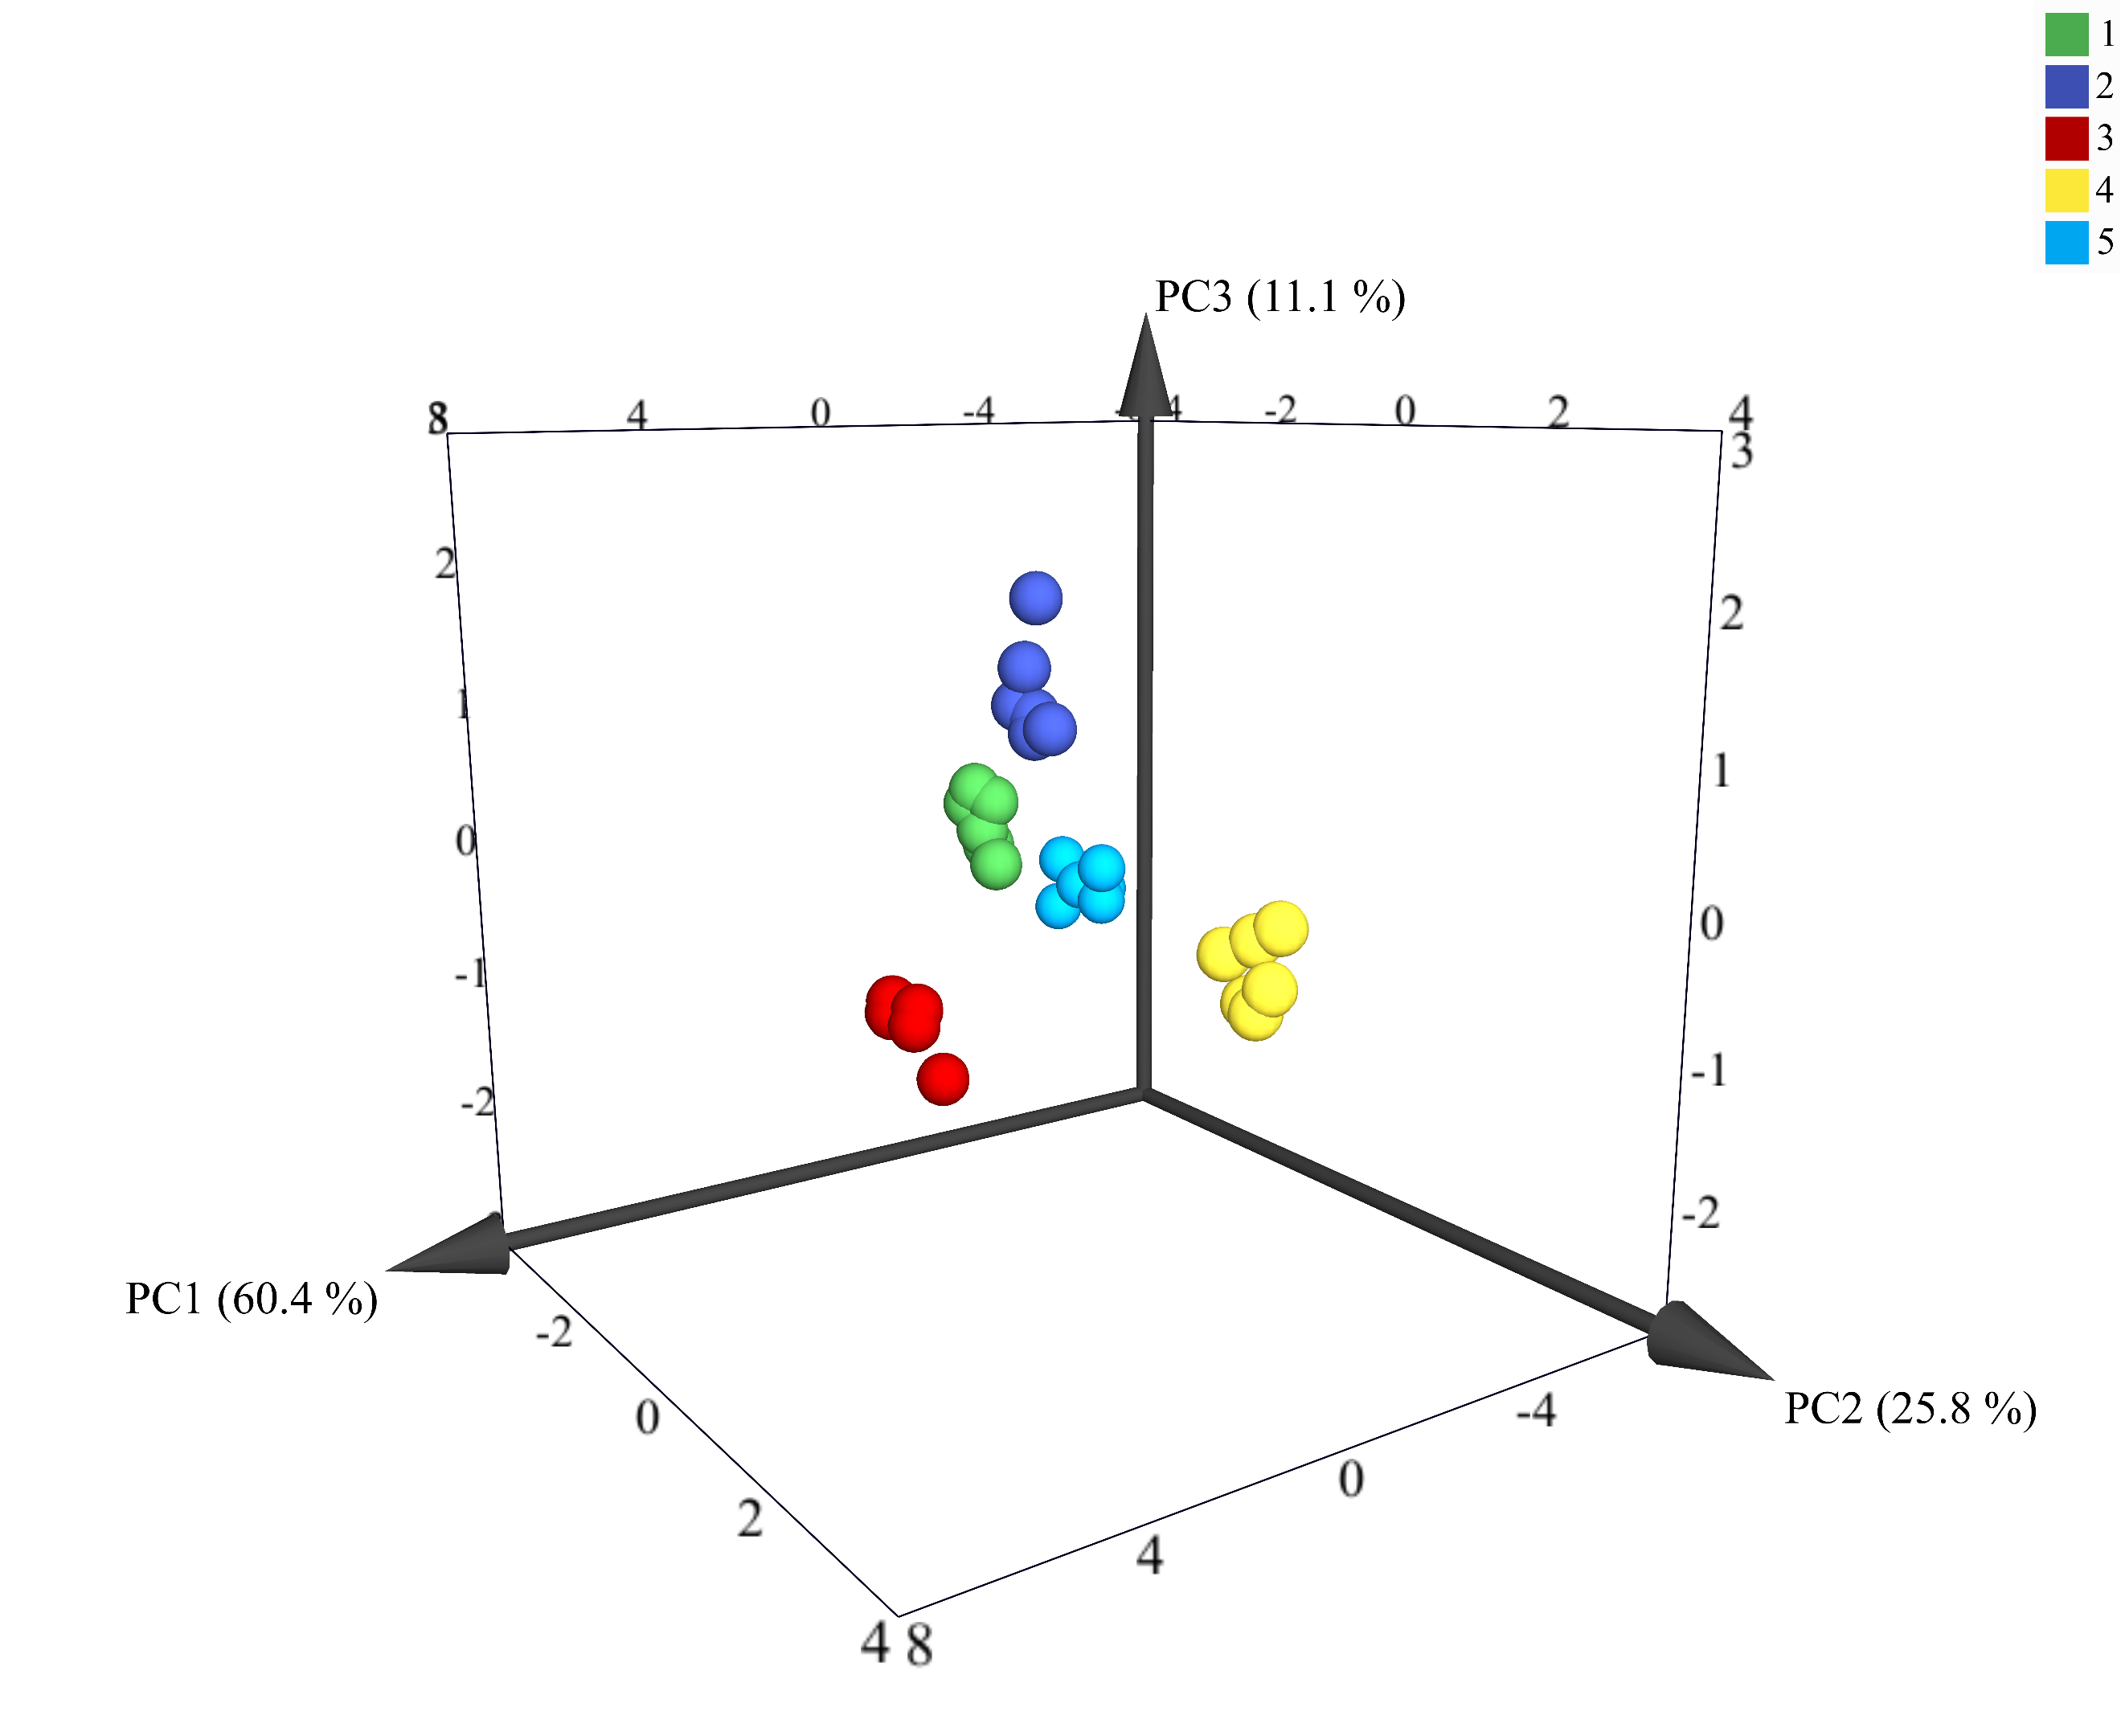


**Fig. S11.** 3D canonical score plot for the response patterns of five kinds of bacteria (OD600=0.1) by PCA. Each point represents the response pattern for single bacteria species to the sensor.


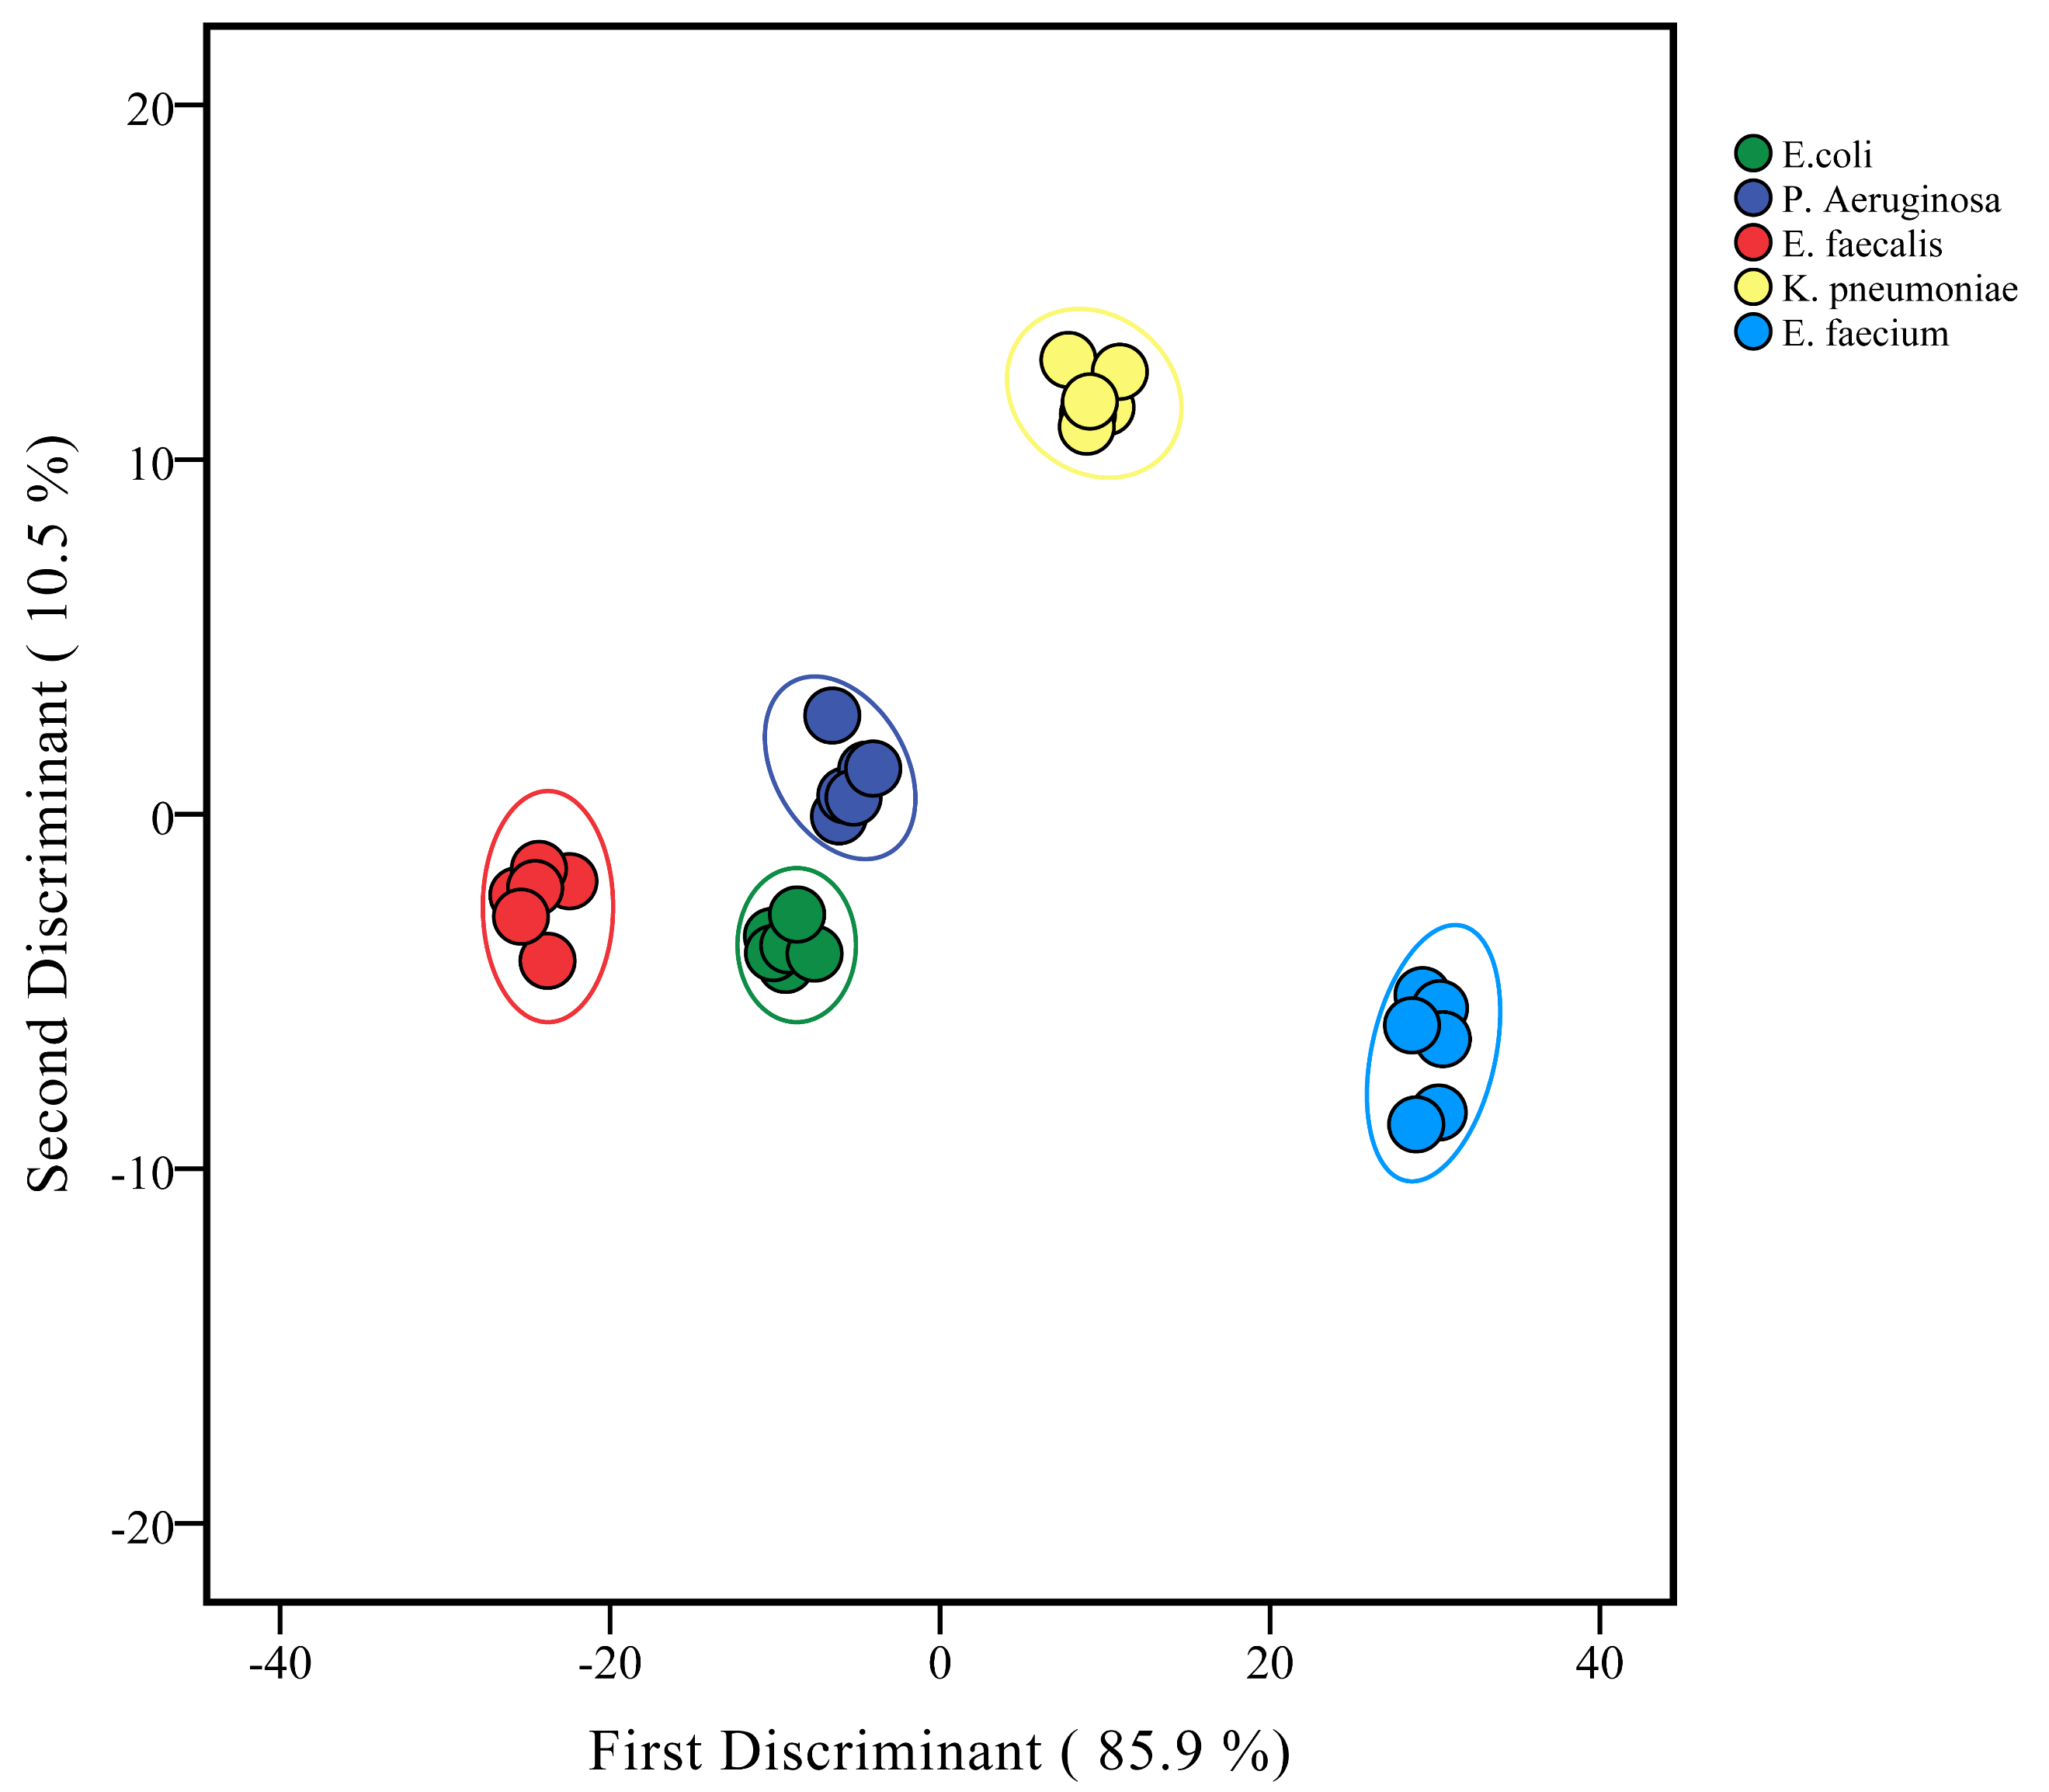


**Fig. S12.** Canonical score plot for the response patterns of five kinds of bacteria (OD600=0.1) by LDA. Each point represents the response pattern for single bacteria species to the sensor.


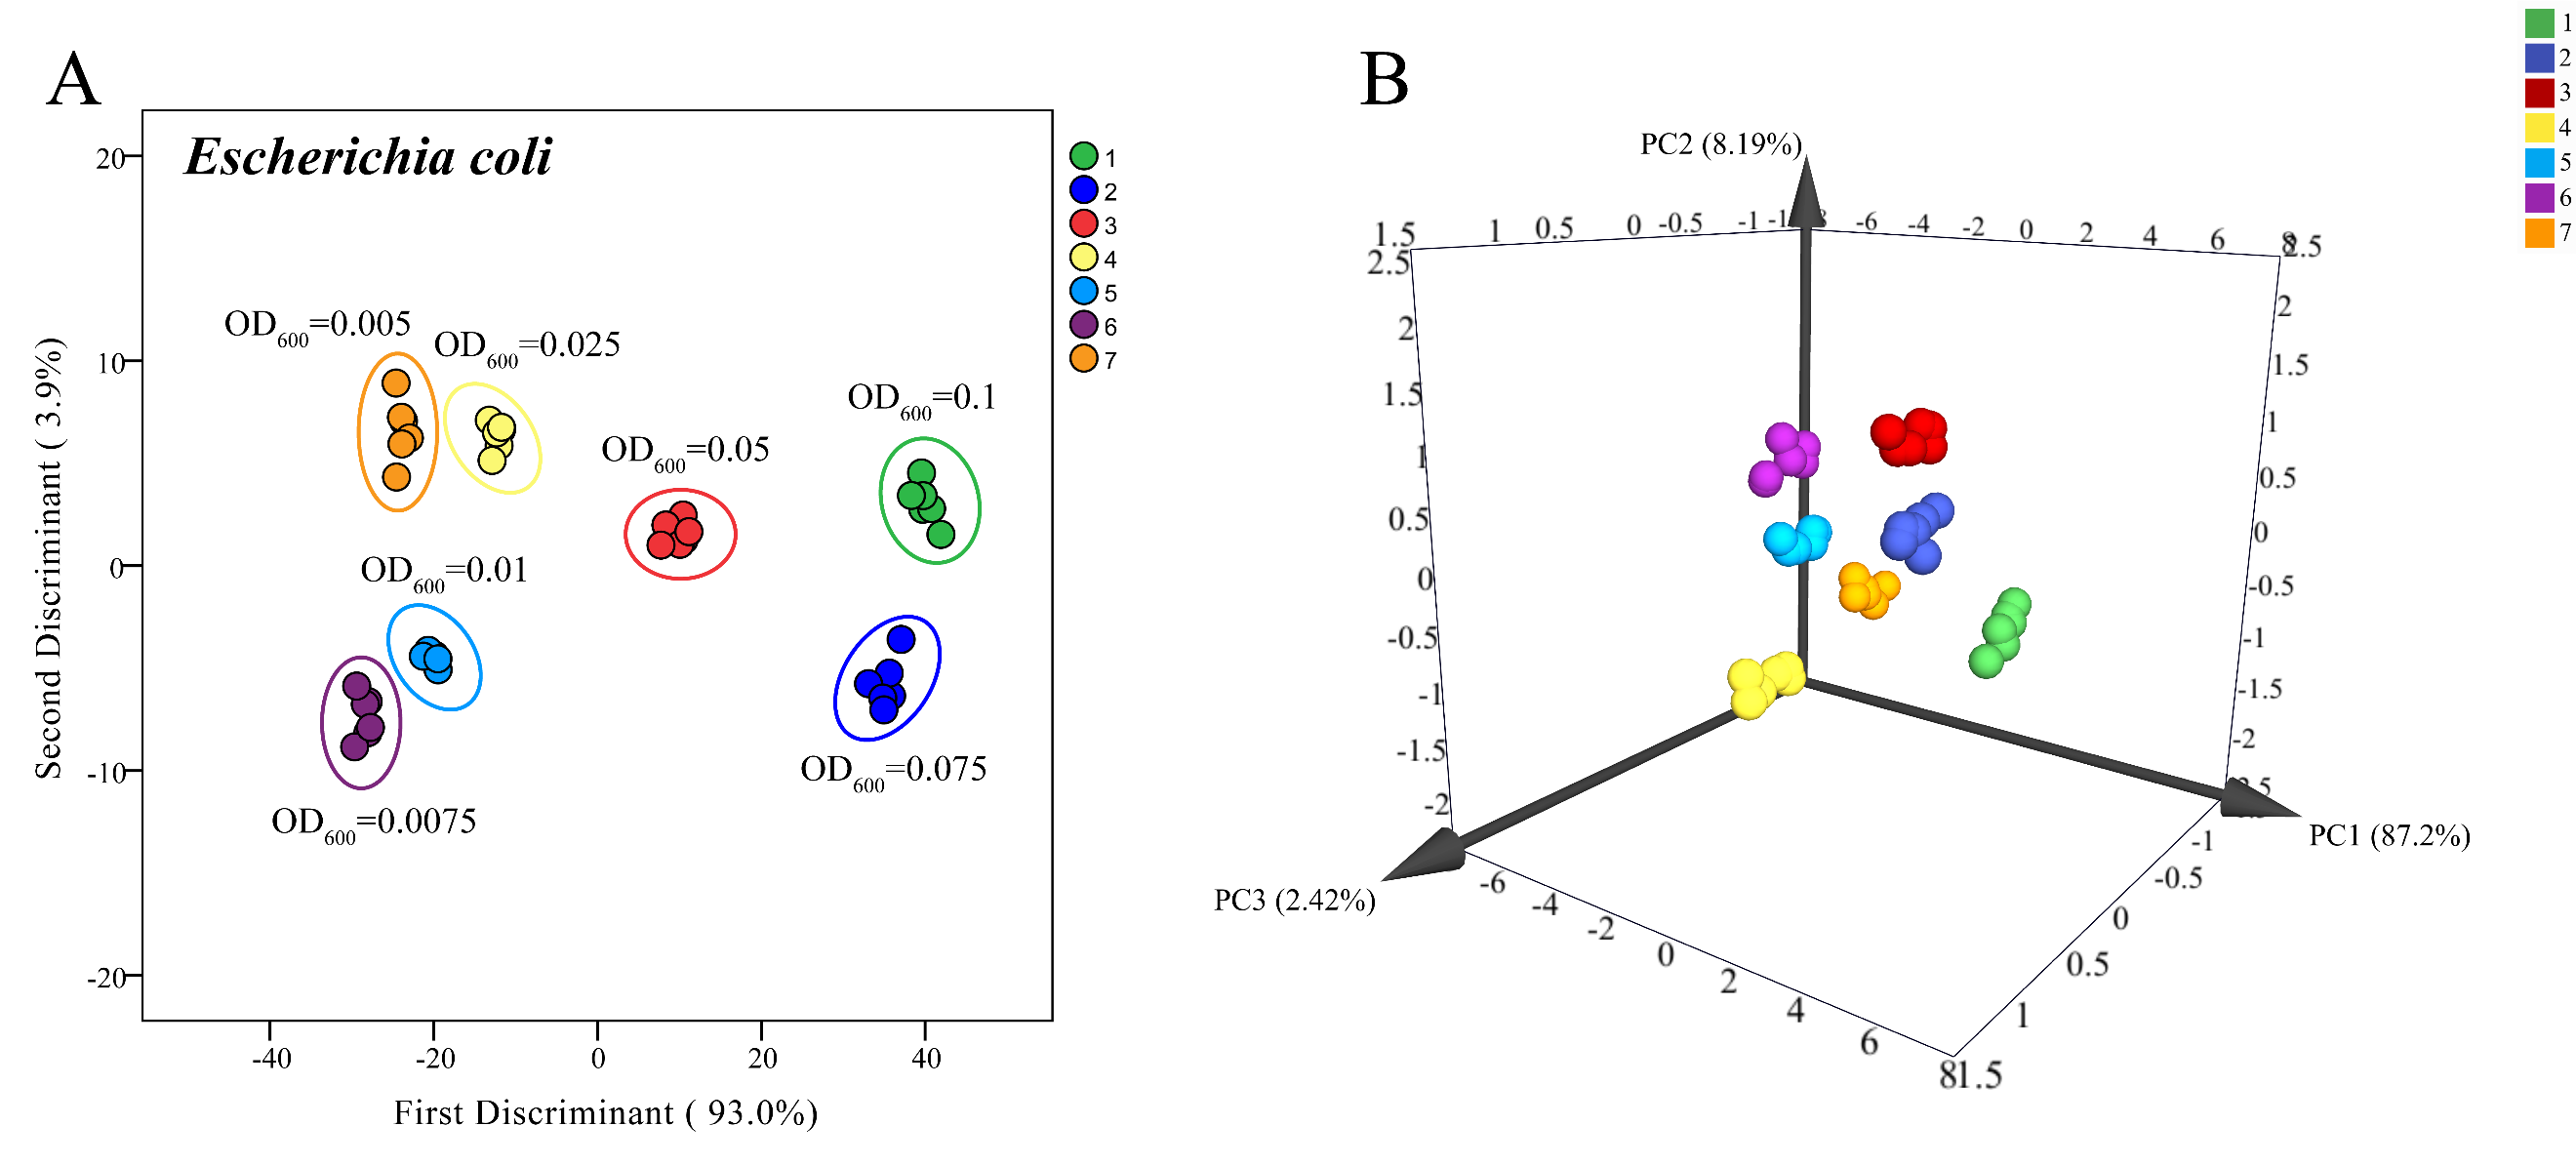


**Fig. S13.** 2D LDA canonical score plots (A) and 3D PCA canonical score plots (B) obtained from the Ami-AuNP-DNAs sensor against *Escherichia coli* at different concentrations (OD600 from 0.005 to 0.1). Each point represents the response pattern for single bacteria to the array.


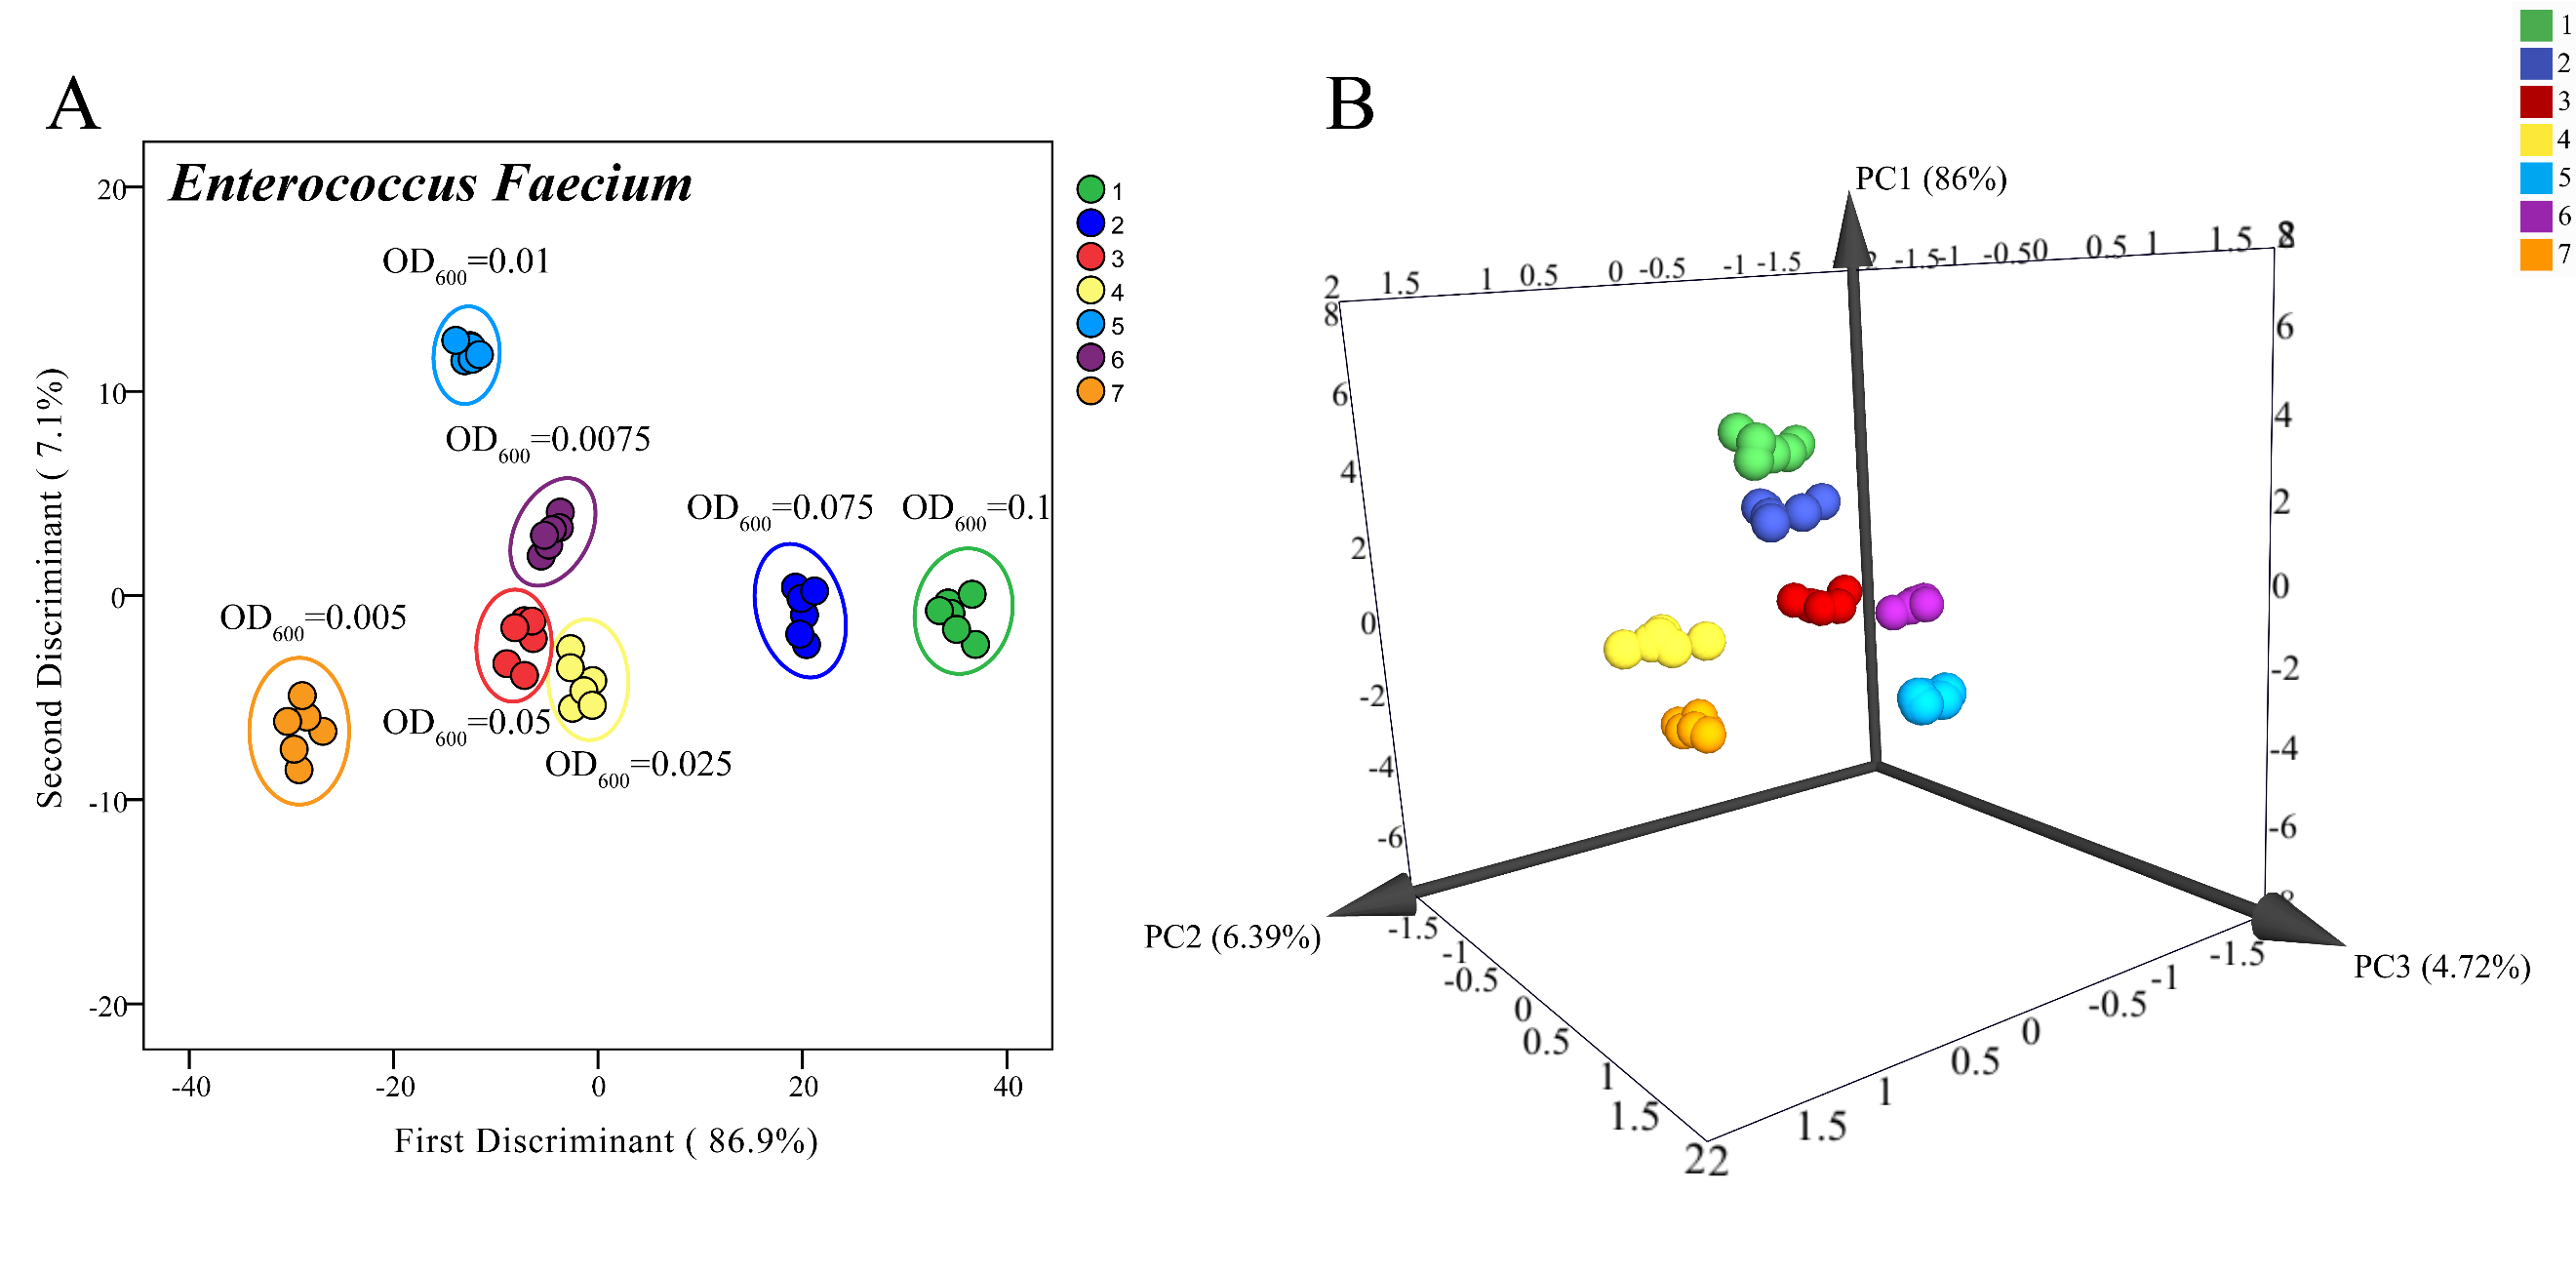


**Fig. S14.** 2D LDA canonical score plots (A) and 3D PCA canonical score plots (B) obtained from the Ami-AuNP-DNAs sensor against *Enterococcus faecium* at different concentrations (OD600 from 0.005 to 0.1). Each point represents the response pattern for single bacteria to the array.


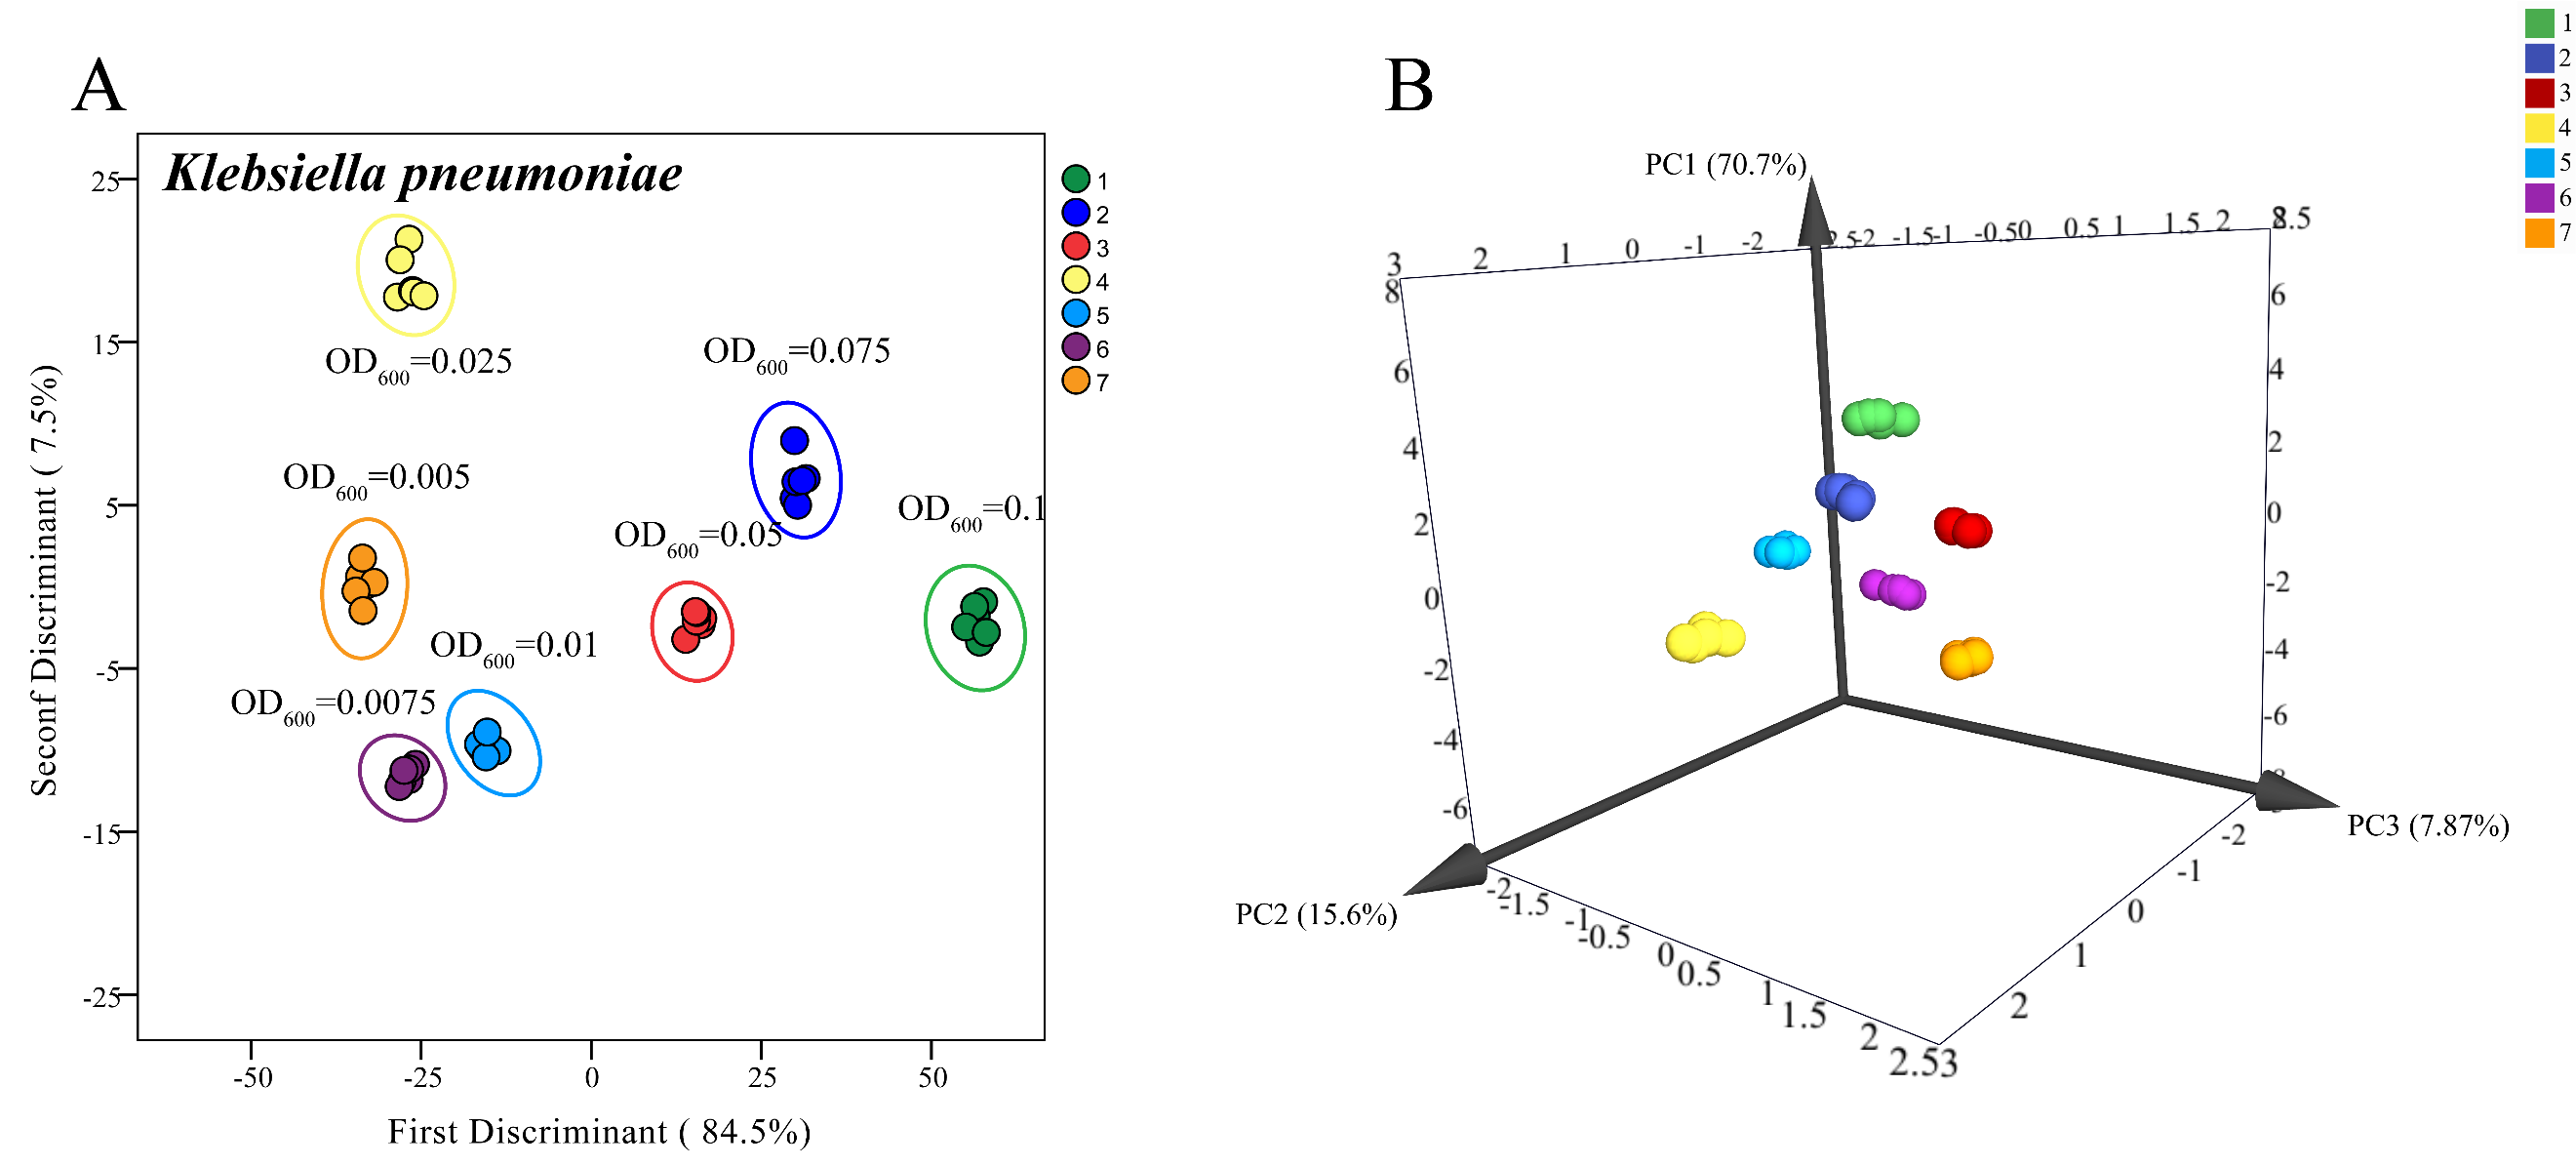


**Fig. S15.** 2D LDA canonical score plots (A) and 3D PCA canonical score plots (B) obtained from the Ami-AuNP-DNAs sensor against *Klebsiella pneumoniae* at different concentrations (OD600 from 0.005 to 0.1). Each point represents the response pattern for single bacteria to the array.


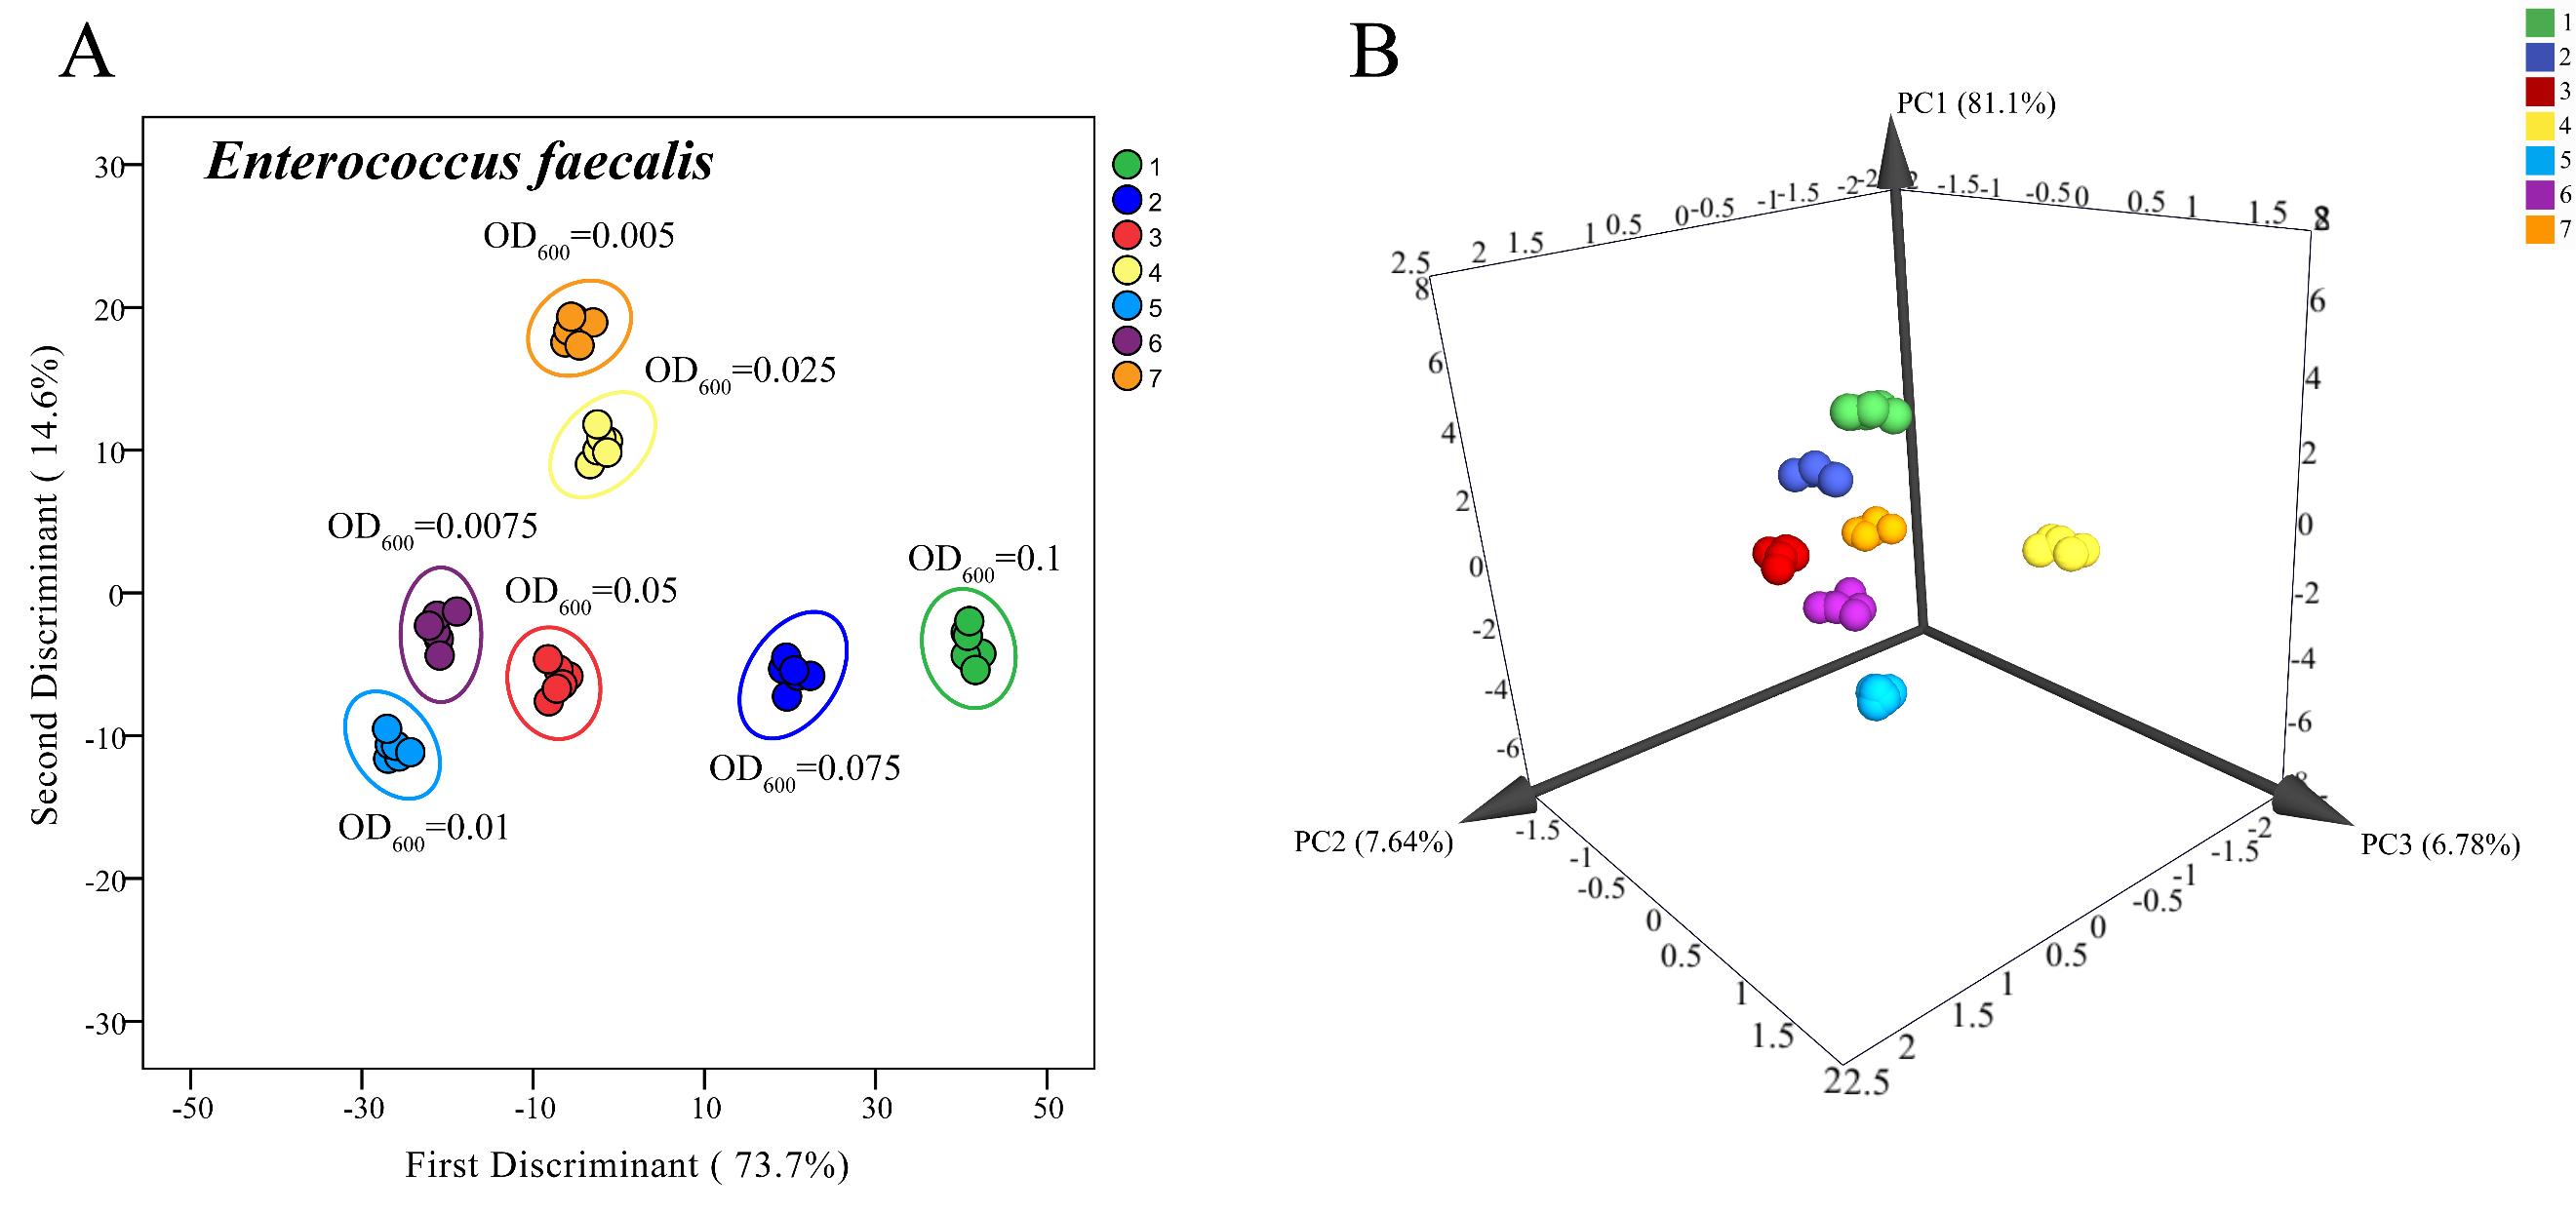


**Fig. S16.** 2D LDA canonical score plots (A) and 3D PCA canonical score plots (B) obtained from the Ami-AuNP-DNAs sensor against *Enterococcus faecalis* at different concentrations (OD600 from 0.005 to 0.1). Each point represents the response pattern for single bacteria to the array.


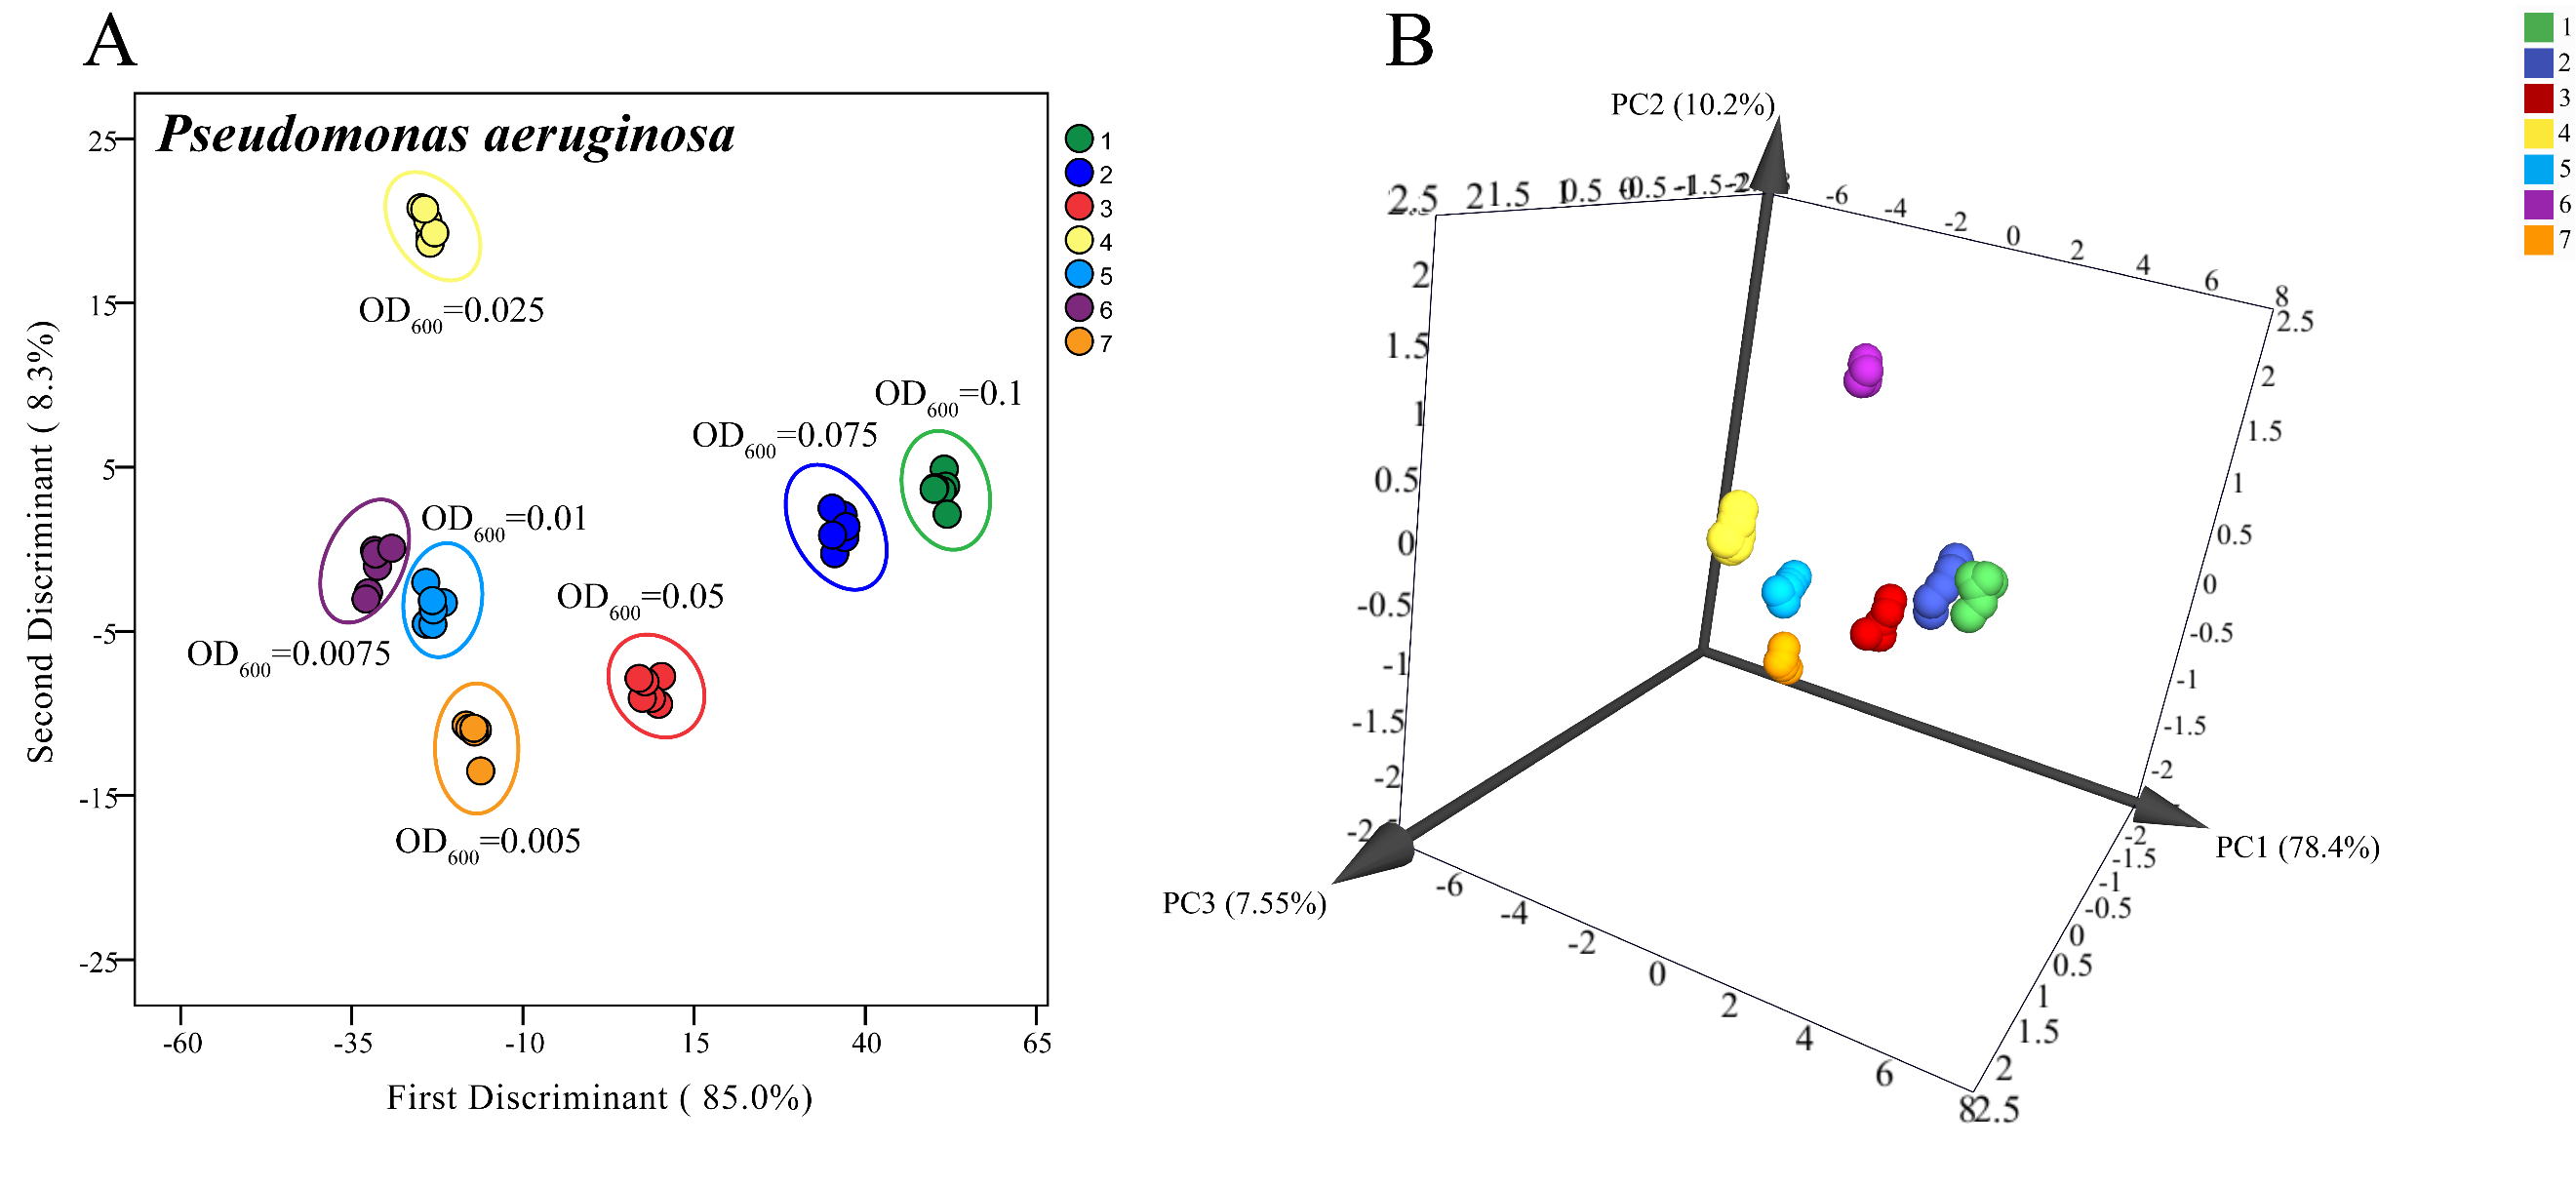


**Fig. S17.** 2D LDA canonical score plots (A) and 3D PCA canonical score plots (B) obtained from the Ami-AuNP-DNAs sensor against *Pseudomonas aeruginosa* at different concentrations (OD600 from 0.005 to 0.1). Each point represents the response pattern for single bacteria to the array.


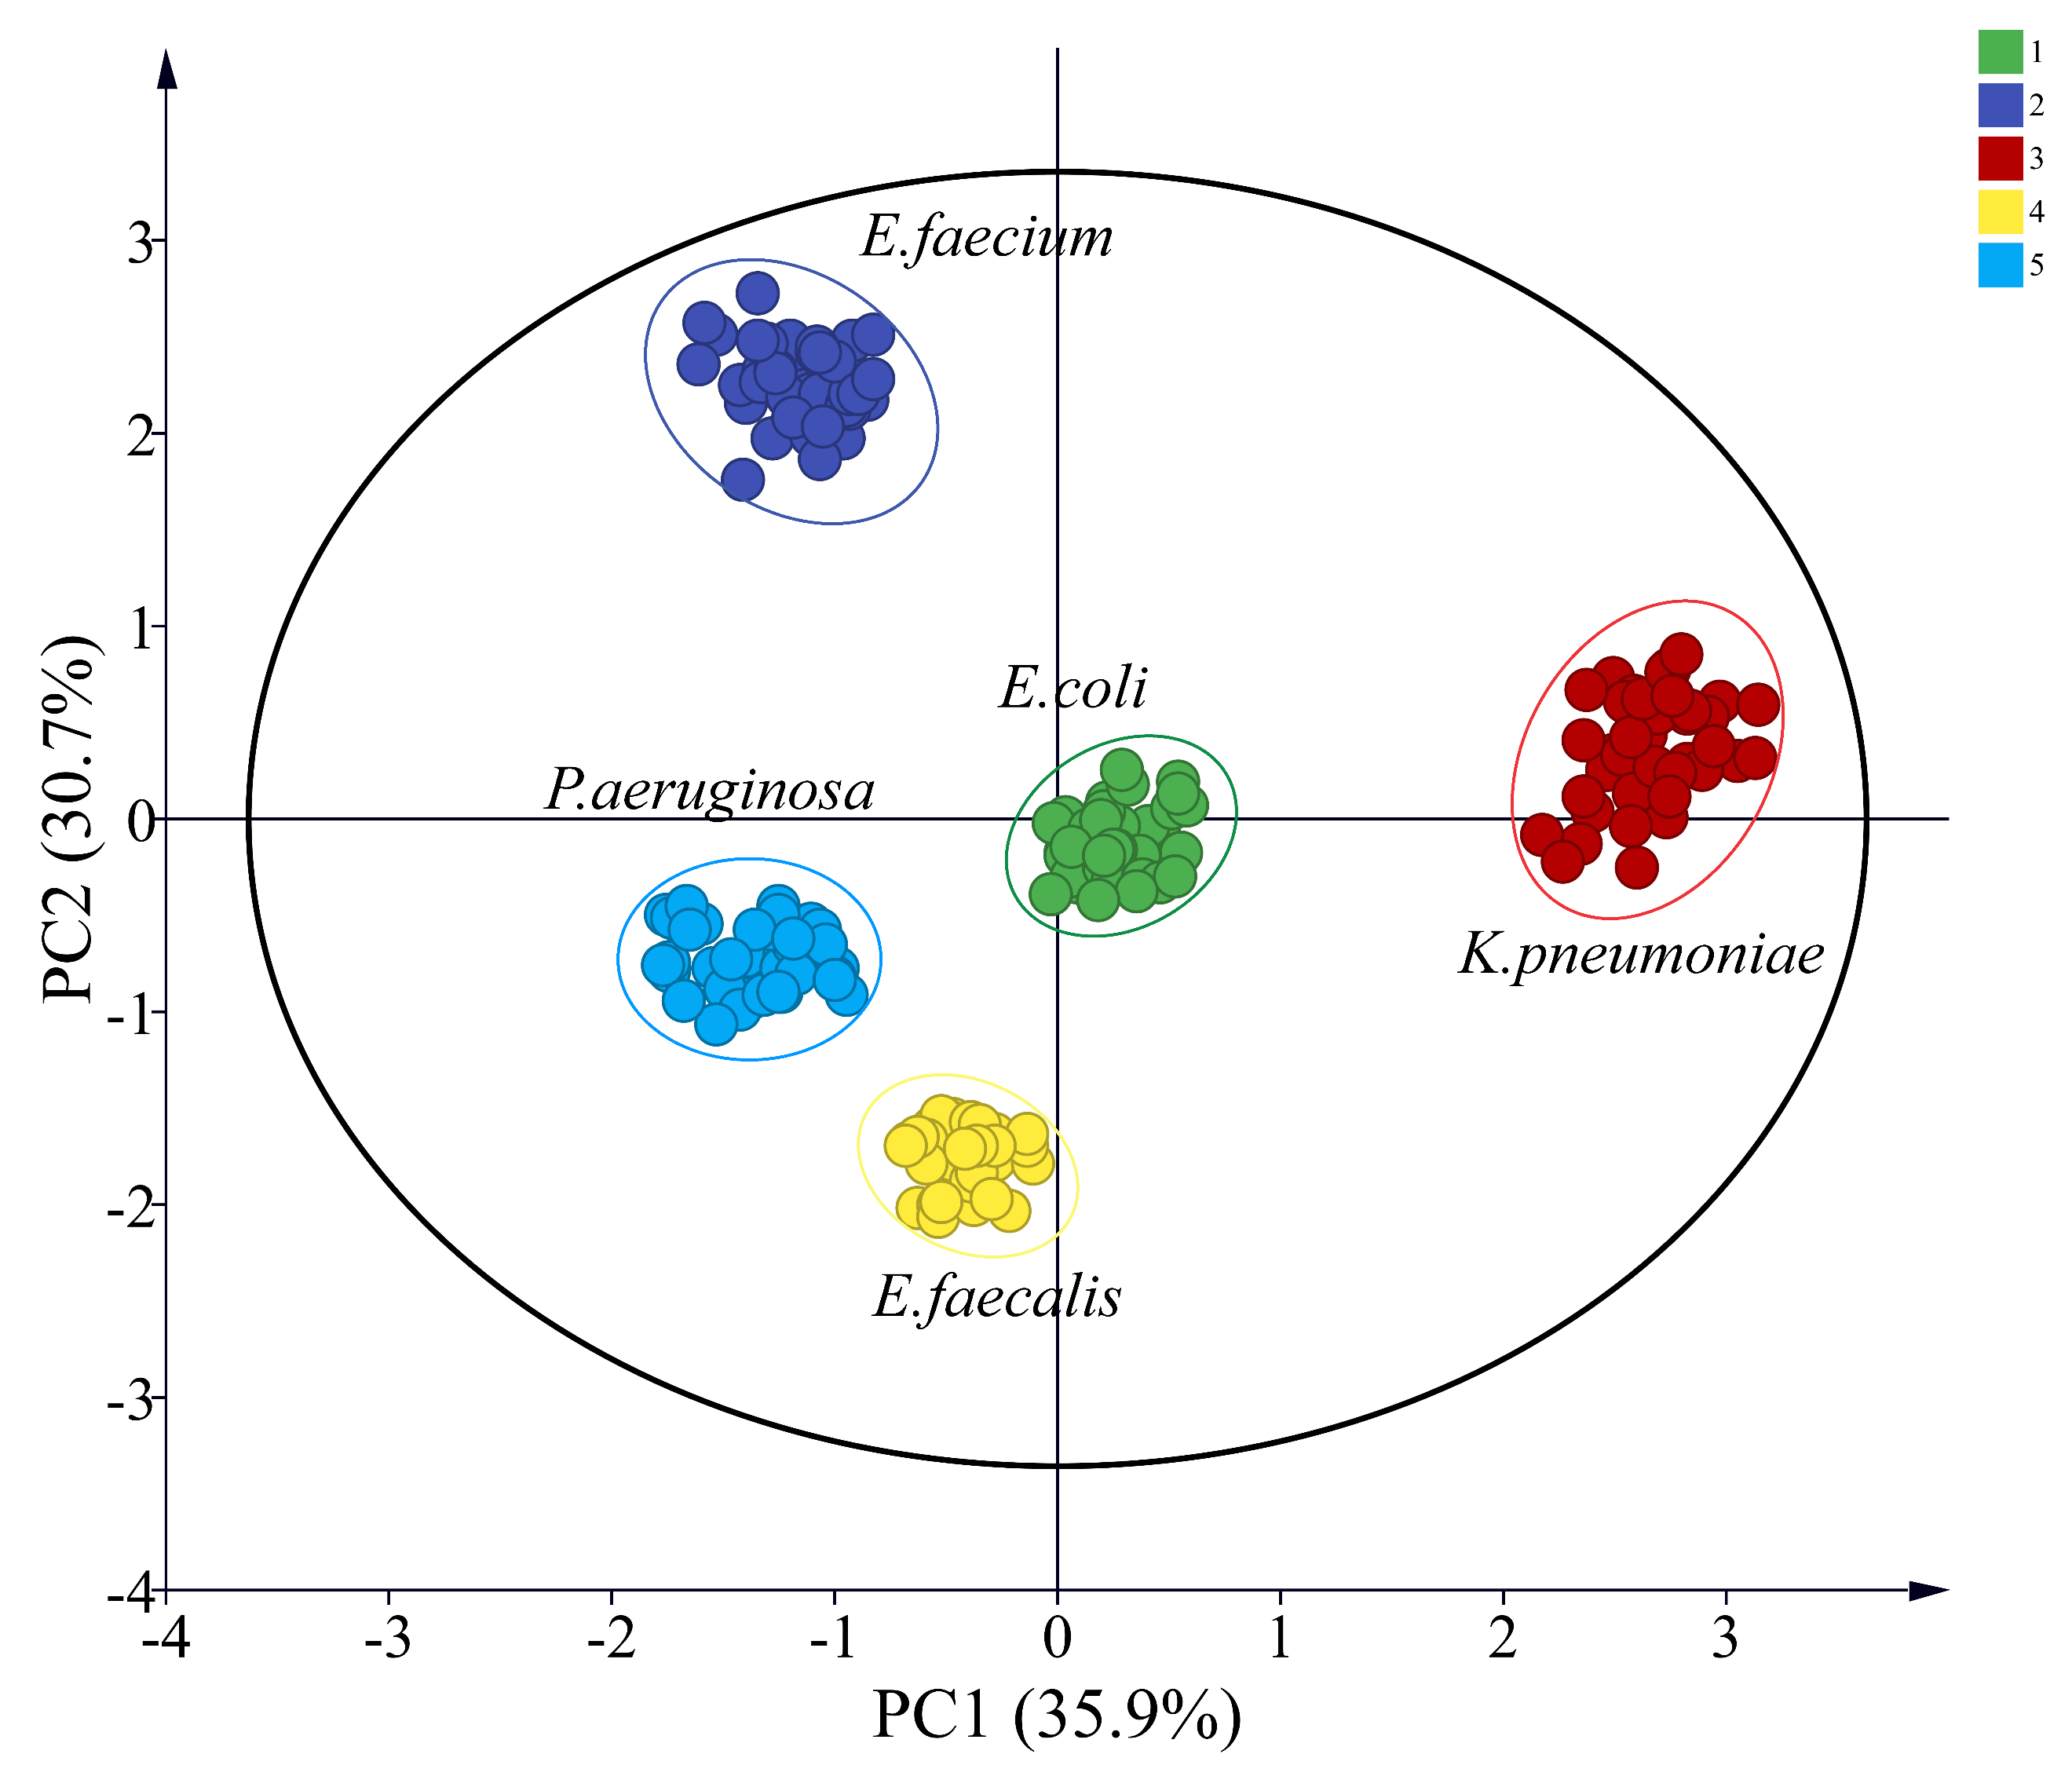


**Fig. S18.** 2D canonical score plot for the response patterns of five kinds of bacteria isolated from urine samples of clinical urinary tract infections (OD600=0.1) by PCA. Each point represents the response pattern for single bacteria species to the sensor.

**Table S1.** Zeta potential of bacteria used in this article.

| Bacteria | Zeta potential (mV) |
| --- | --- |
| *Escherichia coli* | -2.54 |
| *Enterococcus faecium* | -8.64 |
| *Klebsiella pneumoniae* | -9.83 |
| *Enterococcus faecalis* | -27.56 |
| *Pseudomonas aeruginosa* | -10.44 |

**Table S2.** The fluorescence response pattern of six DNAs in five kinds of bacteria

| **Number** | **5A-VIC** | **10A-TAMRA** | **20A-Texas Red** | | **30A-Cy5** | **40A-Cy5.5** | **50A-Cy7** |
| --- | --- | --- | --- | --- | --- | --- | --- |
| *E.coli-1* | 53.2409 | 40.2804 | 41.6227 | | 20.8322 | 2.5113 | 22.0001 |
| *E.coli-2* | 57.2333 | 40.8026 | 40.9677 | | 20.1737 | 2.5532 | 18.9988 |
| *E.coli-3* | 58.3545 | 41.8321 | 41.6227 | | 20.0274 | 2.4731 | 16.6895 |
| *E.coli-4* | 55.5934 | 40.1256 | 41.1284 | | 20.2883 | 2.0687 | 18.8537 |
| *E.coli-5* | 51.4297 | 44.8149 | 42.1840 | | 22.3977 | 2.7979 | 16.9675 |
| *E.coli-6* | 58.5444 | 42.1973 | 43.6065 | | 21.4454 | 2.3641 | 18.8537 |
| *E.faecium-1* | 69.7231 | 59.9756 | 102.2770 | | 45.4743 | 5.6763 | 37.6088 |
| *E.faecium-2* | 62.1178 | 53.0285 | 105.8880 | | 49.4762 | 5.8777 | 35.1989 |
| *E.faecium-3* | 67.3881 | 53.4816 | 101.7790 | | 48.2038 | 6.1687 | 34.8860 |
| *E.faecium-4* | 64.3482 | 59.9387 | 103.6580 | | 47.8666 | 5.7792 | 36.7909 |
| *E.faecium-5* | 68.1654 | 57.7252 | 100.0950 | | 50.9071 | 5.9233 | 38.8324 |
| *E.faecium-6* | 61.2162 | 60.8234 | 100.7010 | | 49.6337 | 5.8094 | 34.1566 |
| *K.pneumoniae-1* | 56.7951 | 82.8433 | 82.9507 | | 36.6309 | 2.5630 | 49.6867 |
| *K.pneumoniae-2* | 62.4834 | 84.0875 | 79.2329 | | 35.7867 | 2.2198 | 52.3905 |
| *K.pneumoniae-3* | 67.6656 | 78.9493 | 81.6153 | | 37.5403 | 2.3301 | 50.8367 |
| *K.pneumoniae-4* | 56.6561 | 84.6223 | 82.9581 | | 34.0553 | 2.7261 | 44.3559 |
| *K.pneumoniae-5* | 68.2963 | 86.5011 | 80.5782 | | 35.1348 | 2.6996 | 50.6708 |
| *K.pneumoniae-6* | 55.9323 | 80.7282 | 83.5823 | | 33.6205 | 2.5509 | 51.2579 |
| *E.faecalis-1* | 17.9221 | 32.3269 | 37.2434 | | 14.2808 | 1.2034 | 18.3836 |
| *E.faecalis-2* | 16.1642 | 36.5366 | 36.4835 | | 14.2808 | 1.5150 | 21.5984 |
| *E.faecalis-3* | 17.1312 | 38.0673 | 37.2434 | | 14.6178 | 1.2529 | 15.8619 |
| *E.faecalis-4* | 13.1073 | 33.6639 | 37.4353 | | 14.1976 | 1.0836 | 16.0790 |
| *E.faecalis-5* | 13.6429 | 32.9963 | 38.1951 | | 14.8613 | 1.6119 | 12.7944 |
| *E.faecalis-6* | 14.7193 | 33.1810 | 37.4327 | | 15.0384 | 1.3232 | 14.4340 |
| *P.aeruginosa-1* | 77.0561 | 53.3235 | 45.8468 | | 18.8708 | 2.2154 | 15.7796 |
| *P.aeruginosa-2* | 70.8467 | 55.6136 | 44.5365 | | 18.8305 | 2.1630 | 17.3101 |
| *P.aeruginosa-3* | 68.6860 | 60.0050 | 45.8468 | | 18.3270 | 1.8453 | 17.1994 |
| *P.aeruginosa-4* | 67.6472 | 57.4007 | 46.7515 | | 18.6816 | 2.0771 | 15.5449 |
| *P.aeruginosa-5* | 71.5575 | 53.5292 | 46.7299 | | 20.0847 | 2.0331 | 15.6043 |
| *P.aeruginosa-6* | 84.4201 | 57.4251 | | 47.3473 | 19.2578 | 2.0771 | 13.7664 |

**Table S3.** Classification results and model performance of five kinds of bacteria detection and discrimination

| **Actual categories** | **Prediction results** | | | | | **Accuracy** | **Precision** | **Sensitivity** | **Specificity** |
| --- | --- | --- | --- | --- | --- | --- | --- | --- | --- |
| *E.*  *coli* | *E.*  *faecium* | *K.pneum-oniae* | *E.*  *faecalis* | *P.*  *aeruginosa* |
| *E.coli* | 6 | 0 | 0 | 0 | 0 | 100% | 1.00 | 1.00 | 1.00 |
| *E.faecium* | 0 | 6 | 0 | 0 | 0 |
| *K.pneumoniae* | 0 | 0 | 6 | 0 | 0 |
| *E.faecalis* | 0 | 0 | 0 | 6 | 0 |
| *P.aeruginosa* | 0 | 0 | 0 | 0 | 6 |  |  |  |  |

**Table S4.** Fluorescence response pattern obtained from the Ami-AuNP-DNAs sensoragainst *Escherichia coli* at different concentrations (OD600 from 0.005 to 0.1).

| **Concentration** | **5A-VIC** | **10A-TAMRA** | **20A-Texas Red** | **30A-Cy5** | **40A-Cy5.5** | **50A-Cy7** | **Group** |
| --- | --- | --- | --- | --- | --- | --- | --- |
| OD600=0.1 | 88.1204 | 78.7223 | 49.4034 | 37.7849 | 6.4786 | 43.1015 | 1 |
| OD600=0.1 | 87.4550 | 79.4653 | 47.9772 | 34.8912 | 6.4899 | 44.4525 | 1 |
| OD600=0.1 | 88.0363 | 79.3630 | 48.9953 | 41.0549 | 6.4935 | 42.3844 | 1 |
| OD600=0.1 | 88.4214 | 79.5956 | 47.5021 | 37.1202 | 6.5220 | 43.3917 | 1 |
| OD600=0.1 | 88.3931 | 80.0137 | 47.1771 | 36.4102 | 6.4919 | 41.6215 | 1 |
| OD600=0.1 | 89.5676 | 78.2782 | 47.9043 | 39.5728 | 6.5130 | 42.8877 | 1 |
| OD600=0.075 | 80.0872 | 66.4143 | 62.5434 | 33.1566 | 7.1315 | 39.0793 | 2 |
| OD600=0.075 | 77.5831 | 64.4973 | 63.3442 | 30.6140 | 7.0939 | 38.5634 | 2 |
| OD600=0.075 | 79.3221 | 64.7370 | 61.9393 | 32.6244 | 7.1949 | 32.5451 | 2 |
| OD600=0.075 | 77.8852 | 64.0076 | 57.1671 | 29.1302 | 7.2426 | 37.7486 | 2 |
| OD600=0.075 | 77.4425 | 65.1757 | 59.9911 | 30.0757 | 7.2145 | 37.3626 | 2 |
| OD600=0.075 | 75.3186 | 66.2252 | 60.8213 | 30.8811 | 7.1970 | 37.1718 | 2 |
| OD600=0.05 | 69.2954 | 45.7894 | 38.1574 | 27.8104 | 8.2151 | 30.0867 | 3 |
| OD600=0.05 | 70.4197 | 44.4867 | 38.1972 | 25.2425 | 8.1764 | 31.5601 | 3 |
| OD600=0.05 | 68.2936 | 44.3564 | 36.4123 | 27.3917 | 8.0349 | 27.0175 | 3 |
| OD600=0.05 | 71.7674 | 41.6256 | 39.8721 | 24.8637 | 8.0329 | 28.5297 | 3 |
| OD600=0.05 | 66.0971 | 42.0792 | 38.9581 | 26.0938 | 8.1363 | 29.3209 | 3 |
| OD600=0.05 | 70.4486 | 47.1088 | 36.7693 | 26.4096 | 8.0209 | 31.6672 | 3 |
| OD600=0.025 | 56.0373 | 33.2539 | 26.2213 | 31.6139 | 2.7216 | 21.6273 | 4 |
| OD600=0.025 | 58.8017 | 31.5378 | 24.8866 | 29.2983 | 2.7165 | 20.1258 | 4 |
| OD600=0.025 | 57.1585 | 31.3714 | 24.4977 | 30.8726 | 2.6887 | 20.1076 | 4 |
| OD600=0.025 | 58.9110 | 30.3721 | 25.3929 | 28.7570 | 2.7208 | 22.8242 | 4 |
| OD600=0.025 | 56.5925 | 31.0243 | 25.5305 | 30.0316 | 2.8303 | 16.9807 | 4 |
| OD600=0.025 | 58.5869 | 33.6678 | 23.0993 | 29.9594 | 2.8025 | 22.3671 | 4 |
| OD600=0.01 | 50.9073 | 27.1930 | 14.6275 | 17.4153 | 2.9531 | 14.3650 | 5 |
| OD600=0.01 | 52.6032 | 26.0137 | 13.3441 | 16.1594 | 3.0669 | 13.6870 | 5 |
| OD600=0.01 | 51.7328 | 26.8395 | 15.4184 | 17.3395 | 2.8336 | 11.8236 | 5 |
| OD600=0.01 | 53.0535 | 25.1597 | 13.3472 | 15.8562 | 2.9751 | 13.9262 | 5 |
| OD600=0.01 | 50.1716 | 24.5159 | 15.4390 | 17.1999 | 3.0632 | 12.3213 | 5 |
| OD600=0.01 | 52.4897 | 27.3013 | 13.8820 | 16.5076 | 2.8467 | 14.8183 | 5 |
| OD600=0.0075 | 47.2130 | 16.7602 | 11.2990 | 13.0458 | 3.4733 | 4.7712 | 6 |
| OD600=0.0075 | 48.7813 | 15.3825 | 10.2292 | 9.2318 | 3.4915 | 7.6319 | 6 |
| OD600=0.0075 | 47.4064 | 16.2386 | 11.1930 | 12.8120 | 3.3257 | 4.2579 | 6 |
| OD600=0.0075 | 49.9074 | 13.4151 | 9.8045 | 10.4149 | 3.3262 | 7.3349 | 6 |
| OD600=0.0075 | 46.9448 | 13.2483 | 10.7804 | 9.0768 | 3.5481 | 4.8284 | 6 |
| OD600=0.0075 | 48.5116 | 16.6261 | 10.1751 | 10.7490 | 3.4515 | 5.5031 | 6 |
| OD600=0.005 | 61.3486 | 22.8209 | 6.9239 | 20.7417 | 2.4193 | 18.8716 | 7 |
| OD600=0.005 | 63.7802 | 20.3586 | 7.2746 | 18.8817 | 2.1901 | 20.5199 | 7 |
| OD600=0.005 | 61.8468 | 22.7053 | 8.3543 | 21.0234 | 2.3783 | 15.9685 | 7 |
| OD600=0.005 | 61.1147 | 21.7614 | 7.7193 | 19.5994 | 2.2739 | 18.5767 | 7 |
| OD600=0.005 | 60.1024 | 21.5576 | 6.9237 | 18.8435 | 2.3614 | 15.1548 | 7 |
| OD600=0.005 | 62.2147 | 22.0114 | 5.8552 | 21.3210 | 2.2945 | 20.4070 | 7 |

**Table S5.** Fluorescence response pattern obtained from the Ami-AuNP-DNAs sensoragainst *Enterococcus Faecium* at different concentrations (OD600 from 0.005 to 0.1).

| **Concentration** | **5A-VIC** | **10A-TAMRA** | **20A-Texas Red** | **30A-Cy5** | **40A-Cy5.5** | **50A-Cy7** | **Group** |
| --- | --- | --- | --- | --- | --- | --- | --- |
| OD600=0.1 | 81.6070 | 103.1010 | 121.1000 | 46.6064 | 30.3959 | 57.8335 | 1 |
| OD600=0.1 | 84.4263 | 104.0440 | 127.3100 | 49.5039 | 39.5345 | 56.6324 | 1 |
| OD600=0.1 | 81.8109 | 109.8800 | 123.6170 | 48.2321 | 37.7163 | 55.9360 | 1 |
| OD600=0.1 | 80.1860 | 108.7100 | 126.9540 | 42.9062 | 32.5364 | 54.2326 | 1 |
| OD600=0.1 | 82.1860 | 104.2160 | 122.9810 | 46.5802 | 34.4105 | 51.3834 | 1 |
| OD600=0.1 | 88.0146 | 102.8660 | 129.8500 | 44.6862 | 30.6979 | 53.2735 | 1 |
| OD600=0.075 | 73.5581 | 86.4261 | 105.1490 | 34.8200 | 24.7758 | 49.1209 | 2 |
| OD600=0.075 | 74.4375 | 84.9220 | 109.0920 | 38.0878 | 26.5634 | 44.0796 | 2 |
| OD600=0.075 | 75.0216 | 88.1205 | 102.2970 | 32.0157 | 27.0657 | 48.0550 | 2 |
| OD600=0.075 | 77.1591 | 83.5188 | 106.3700 | 36.7048 | 29.9867 | 44.1882 | 2 |
| OD600=0.075 | 79.9054 | 82.8893 | 103.4550 | 39.3438 | 25.1880 | 43.4785 | 2 |
| OD600=0.075 | 76.4821 | 89.5252 | 106.7740 | 35.2272 | 23.4043 | 46.9352 | 2 |
| OD600=0.05 | 66.3122 | 48.4171 | 73.6301 | 23.2166 | 10.7348 | 20.3395 | 3 |
| OD600=0.05 | 69.5766 | 44.8332 | 74.9821 | 24.7186 | 10.7910 | 22.3808 | 3 |
| OD600=0.05 | 65.8456 | 41.1563 | 72.9351 | 22.4433 | 11.8528 | 21.8577 | 3 |
| OD600=0.05 | 68.8668 | 44.4673 | 70.4321 | 25.9787 | 12.2388 | 24.2991 | 3 |
| OD600=0.05 | 66.8755 | 46.0326 | 71.7398 | 21.4425 | 13.2589 | 21.5454 | 3 |
| OD600=0.05 | 65.9618 | 43.4305 | 76.1236 | 23.4217 | 14.3417 | 22.6130 | 3 |
| OD600=0.025 | 47.7150 | 67.4162 | 86.0265 | 19.7487 | 17.5066 | 33.7497 | 4 |
| OD600=0.025 | 43.4757 | 63.2373 | 83.7916 | 18.1115 | 17.2378 | 35.8680 | 4 |
| OD600=0.025 | 48.3465 | 64.7133 | 85.8089 | 16.0137 | 15.9607 | 36.9309 | 4 |
| OD600=0.025 | 49.6476 | 65.0955 | 81.1645 | 19.0909 | 14.4039 | 31.0423 | 4 |
| OD600=0.025 | 49.3814 | 62.9997 | 87.8493 | 17.0376 | 13.9503 | 38.7315 | 4 |
| OD600=0.025 | 47.1845 | 65.4909 | 82.6013 | 17.6323 | 15.4773 | 32.4773 | 4 |
| OD600=0.01 | 52.5143 | 74.5335 | 45.3526 | 12.3391 | 7.4971 | 17.1382 | 5 |
| OD600=0.01 | 53.0101 | 70.0487 | 44.2455 | 12.4372 | 5.8052 | 19.7562 | 5 |
| OD600=0.01 | 55.3899 | 73.2775 | 46.9623 | 13.9108 | 6.4144 | 14.3638 | 5 |
| OD600=0.01 | 54.0693 | 74.9127 | 49.4556 | 10.4726 | 6.8150 | 15.8287 | 5 |
| OD600=0.01 | 52.7074 | 75.4945 | 47.6647 | 13.8952 | 8.4425 | 16.0766 | 5 |
| OD600=0.01 | 56.1570 | 71.6520 | 44.2816 | 11.9099 | 7.9338 | 13.3146 | 5 |
| OD600=0.0075 | 60.1938 | 53.8615 | 67.0439 | 26.5296 | 0.8037 | 27.8750 | 6 |
| OD600=0.0075 | 63.5935 | 57.8696 | 65.5253 | 27.5749 | 0.8404 | 29.2657 | 6 |
| OD600=0.0075 | 62.4941 | 55.3828 | 68.3842 | 27.4058 | 0.7263 | 26.0347 | 6 |
| OD600=0.0075 | 63.3938 | 56.1124 | 66.5109 | 29.3928 | 0.6407 | 27.9979 | 6 |
| OD600=0.0075 | 62.4941 | 54.3522 | 64.3146 | 28.8299 | 0.7953 | 29.6187 | 6 |
| OD600=0.0075 | 61.0480 | 52.5164 | 62.6636 | 30.4539 | 0.8256 | 28.6094 | 6 |
| OD600=0.005 | 38.2259 | 28.4335 | 58.8834 | 8.1663 | 4.7352 | 7.7451 | 7 |
| OD600=0.005 | 36.1146 | 27.7721 | 54.6383 | 6.0782 | 4.0323 | 9.0328 | 7 |
| OD600=0.005 | 35.7418 | 29.2749 | 52.5829 | 5.9390 | 3.4703 | 7.8304 | 7 |
| OD600=0.005 | 34.7665 | 23.9025 | 51.5420 | 7.8252 | 2.7059 | 6.5949 | 7 |
| OD600=0.005 | 34.5092 | 22.0865 | 57.6774 | 6.8051 | 2.1284 | 9.5058 | 7 |
| OD600=0.005 | 33.6250 | 24.4539 | 55.8879 | 7.1283 | 2.9895 | 6.8793 | 7 |

**Table S6.** Fluorescence response pattern obtained from the Ami-AuNP-DNAs sensoragainst *Klebsiella pneumoniae* at different concentrations (OD600 from 0.005 to 0.1).

| **Concentration** | **5A-VIC** | **10A-TAMRA** | **20A-Texas Red** | **30A-Cy5** | **40A-Cy5.5** | **50A-Cy7** | **Group** |
| --- | --- | --- | --- | --- | --- | --- | --- |
| OD600=0.1 | 111.1850 | 126.6390 | 57.5379 | 45.8495 | 34.1723 | 63.9443 | 1 |
| OD600=0.1 | 112.5710 | 125.7500 | 55.6912 | 46.3621 | 32.2838 | 62.1268 | 1 |
| OD600=0.1 | 113.9420 | 120.7900 | 54.6774 | 48.4693 | 33.7250 | 64.0121 | 1 |
| OD600=0.1 | 115.2890 | 125.2610 | 56.8793 | 43.6477 | 30.6451 | 60.6326 | 1 |
| OD600=0.1 | 113.7990 | 127.8540 | 52.3310 | 44.4503 | 31.8862 | 61.8002 | 1 |
| OD600=0.1 | 117.3420 | 121.6690 | 55.3880 | 45.9280 | 33.4359 | 65.7961 | 1 |
| OD600=0.075 | 95.3795 | 92.9443 | 49.1764 | 38.4935 | 41.0411 | 52.5497 | 2 |
| OD600=0.075 | 92.6553 | 95.5660 | 47.9968 | 36.3416 | 40.6576 | 54.9680 | 2 |
| OD600=0.075 | 94.3007 | 93.9106 | 48.6109 | 34.1884 | 44.3331 | 50.8278 | 2 |
| OD600=0.075 | 93.0436 | 91.9630 | 50.7750 | 37.1830 | 39.1257 | 52.7587 | 2 |
| OD600=0.075 | 96.8268 | 94.6435 | 46.7243 | 33.6933 | 42.5751 | 53.4690 | 2 |
| OD600=0.075 | 92.7235 | 93.0693 | 50.7739 | 38.3593 | 40.3031 | 51.8685 | 2 |
| OD600=0.05 | 86.1192 | 106.4810 | 44.3438 | 16.8527 | 26.8735 | 36.9870 | 3 |
| OD600=0.05 | 87.3088 | 105.3360 | 43.5824 | 17.6856 | 27.5133 | 37.3440 | 3 |
| OD600=0.05 | 85.2526 | 101.0440 | 45.9198 | 14.7758 | 25.7671 | 35.4748 | 3 |
| OD600=0.05 | 89.6377 | 102.1480 | 42.9936 | 15.2712 | 28.1541 | 36.9232 | 3 |
| OD600=0.05 | 88.0429 | 104.5140 | 44.1577 | 16.2851 | 26.3849 | 32.5384 | 3 |
| OD600=0.05 | 84.1940 | 103.0690 | 46.1493 | 17.1015 | 27.4203 | 36.1366 | 3 |
| OD600=0.025 | 45.8276 | 73.2115 | 13.6736 | 24.0121 | 44.0550 | 26.6187 | 4 |
| OD600=0.025 | 43.3083 | 75.0948 | 15.6121 | 23.2166 | 49.9198 | 29.8866 | 4 |
| OD600=0.025 | 46.3725 | 76.6872 | 14.7173 | 20.7625 | 47.6594 | 31.9813 | 4 |
| OD600=0.025 | 47.3199 | 74.1182 | 16.8061 | 21.7126 | 45.3508 | 27.0262 | 4 |
| OD600=0.025 | 44.9236 | 72.8007 | 14.0140 | 22.9482 | 48.3906 | 29.2896 | 4 |
| OD600=0.025 | 46.2976 | 74.4202 | 17.7770 | 23.6374 | 46.1076 | 30.9923 | 4 |
| OD600=0.01 | 65.1719 | 83.5078 | 18.9413 | 27.7273 | 14.3754 | 40.4698 | 5 |
| OD600=0.01 | 63.8340 | 85.0440 | 19.6774 | 29.8989 | 13.5112 | 40.3984 | 5 |
| OD600=0.01 | 62.2257 | 80.5283 | 20.4469 | 26.4983 | 15.5051 | 42.3424 | 5 |
| OD600=0.01 | 61.9127 | 81.1975 | 17.9413 | 29.1799 | 15.4498 | 43.2579 | 5 |
| OD600=0.01 | 63.2973 | 82.7872 | 19.1002 | 28.1474 | 14.1458 | 41.7895 | 5 |
| OD600=0.01 | 64.4066 | 84.4690 | 16.9437 | 27.8683 | 16.5287 | 42.3955 | 5 |
| OD600=0.0075 | 53.1421 | 66.4862 | 30.4190 | 14.3915 | 8.2852 | 24.7746 | 6 |
| OD600=0.0075 | 52.7842 | 65.5321 | 31.8667 | 11.9716 | 7.3695 | 21.3463 | 6 |
| OD600=0.0075 | 55.7492 | 63.9038 | 32.5403 | 12.2428 | 9.3904 | 22.2542 | 6 |
| OD600=0.0075 | 54.0897 | 60.1249 | 33.9424 | 10.0101 | 7.6629 | 20.9867 | 6 |
| OD600=0.0075 | 52.6143 | 62.9684 | 34.2650 | 11.6812 | 9.3347 | 23.3929 | 6 |
| OD600=0.0075 | 56.2884 | 64.7497 | 30.1465 | 10.6571 | 8.9319 | 21.2274 | 6 |
| OD600=0.005 | 77.3366 | 56.5731 | 10.0364 | 4.1991 | 22.8860 | 8.5058 | 7 |
| OD600=0.005 | 74.5601 | 54.1829 | 11.2223 | 6.0207 | 22.4656 | 7.5876 | 7 |
| OD600=0.005 | 76.9208 | 53.3635 | 9.5975 | 5.5737 | 24.9931 | 8.9881 | 7 |
| OD600=0.005 | 78.4863 | 57.7733 | 10.3211 | 3.5457 | 23.7531 | 9.4510 | 7 |
| OD600=0.005 | 75.1564 | 53.1398 | 11.5751 | 4.2789 | 21.8577 | 7.4945 | 7 |
| OD600=0.005 | 76.7823 | 56.9790 | 10.4531 | 3.9360 | 20.6187 | 8.0221 | 7 |

**Table S7.** Fluorescence response pattern obtained from the Ami-AuNP-DNAs sensoragainst *Enterococcus faecalis* at different concentrations (OD600 from 0.005 to 0.1).

| **Concentration** | **5A-VIC** | **10A-TAMRA** | **20A-Texas Red** | **30A-Cy5** | **40A-Cy5.5** | **50A-Cy7** | **Group** |
| --- | --- | --- | --- | --- | --- | --- | --- |
| OD600=0.1 | 89.2568 | 121.8420 | 99.7860 | 48.1065 | 36.1787 | 54.5788 | 1 |
| OD600=0.1 | 85.2319 | 120.0400 | 96.5520 | 43.7751 | 35.8835 | 56.9106 | 1 |
| OD600=0.1 | 87.2766 | 125.4600 | 95.4692 | 45.9552 | 33.1388 | 53.9106 | 1 |
| OD600=0.1 | 86.2835 | 124.5100 | 92.0295 | 46.7635 | 35.7731 | 52.7956 | 1 |
| OD600=0.1 | 84.8963 | 123.9610 | 93.0204 | 47.0530 | 37.8354 | 50.5409 | 1 |
| OD600=0.1 | 89.8404 | 121.2560 | 97.5015 | 49.2376 | 34.8954 | 54.7802 | 1 |
| OD600=0.075 | 74.7518 | 103.1760 | 78.3169 | 31.7482 | 20.9947 | 45.2562 | 2 |
| OD600=0.075 | 75.2195 | 100.9680 | 74.2934 | 34.9221 | 20.7195 | 48.7211 | 2 |
| OD600=0.075 | 77.2052 | 107.8380 | 78.1957 | 32.4985 | 19.9177 | 46.7246 | 2 |
| OD600=0.075 | 76.5818 | 105.0830 | 76.1678 | 35.9625 | 23.2801 | 47.7029 | 2 |
| OD600=0.075 | 79.0615 | 106.7700 | 73.3386 | 31.6248 | 20.1358 | 44.7574 | 2 |
| OD600=0.075 | 74.4454 | 104.9910 | 77.7196 | 34.4875 | 22.5598 | 43.8020 | 2 |
| OD600=0.05 | 67.1962 | 56.2411 | 45.0978 | 23.8010 | 15.7662 | 37.3230 | 3 |
| OD600=0.05 | 65.3110 | 56.4398 | 43.5990 | 22.8024 | 15.4936 | 35.7302 | 3 |
| OD600=0.05 | 64.2179 | 55.6746 | 44.2816 | 25.1200 | 13.7712 | 33.8293 | 3 |
| OD600=0.05 | 66.4475 | 54.4712 | 41.5986 | 20.5779 | 14.8094 | 36.5911 | 3 |
| OD600=0.05 | 68.3842 | 58.4884 | 45.7020 | 24.0897 | 14.0732 | 34.3703 | 3 |
| OD600=0.05 | 66.9251 | 55.8147 | 42.9293 | 23.4379 | 13.8218 | 37.5211 | 3 |
| OD600=0.025 | 58.6220 | 73.2775 | 65.3698 | 6.2767 | 28.0971 | 24.1340 | 4 |
| OD600=0.025 | 57.3097 | 72.3138 | 64.0137 | 5.9979 | 25.2419 | 23.7951 | 4 |
| OD600=0.025 | 59.9120 | 71.2520 | 68.7375 | 6.2001 | 27.0806 | 21.5454 | 4 |
| OD600=0.025 | 54.8298 | 74.9127 | 62.5681 | 6.2471 | 28.1597 | 22.6130 | 4 |
| OD600=0.025 | 55.9682 | 70.7233 | 63.3316 | 5.8254 | 29.8671 | 21.9072 | 4 |
| OD600=0.025 | 56.2581 | 75.7111 | 66.5456 | 5.1396 | 26.2482 | 25.7584 | 4 |
| OD600=0.01 | 39.8996 | 45.0282 | 53.9568 | 17.9096 | 3.3181 | 7.8537 | 5 |
| OD600=0.01 | 38.9370 | 46.2192 | 55.1250 | 18.3091 | 4.2836 | 9.0852 | 5 |
| OD600=0.01 | 37.5385 | 48.0825 | 51.2109 | 16.8547 | 3.6449 | 7.9446 | 5 |
| OD600=0.01 | 40.7089 | 47.3293 | 52.0751 | 17.6216 | 3.9401 | 8.4281 | 5 |
| OD600=0.01 | 41.5911 | 49.4028 | 54.9246 | 19.3247 | 4.5425 | 8.2598 | 5 |
| OD600=0.01 | 39.7263 | 48.1362 | 51.6247 | 15.1370 | 3.5681 | 7.0611 | 5 |
| OD600=0.0075 | 42.3037 | 65.4909 | 26.8687 | 12.3498 | 6.9081 | 33.5280 | 6 |
| OD600=0.0075 | 45.4936 | 62.4587 | 27.7605 | 11.8778 | 7.3240 | 31.1956 | 6 |
| OD600=0.0075 | 41.3448 | 66.1497 | 28.3779 | 10.4606 | 7.9790 | 32.0043 | 6 |
| OD600=0.0075 | 43.2640 | 63.1008 | 29.4093 | 10.8179 | 7.2935 | 33.0433 | 6 |
| OD600=0.0075 | 42.2009 | 65.6740 | 26.4414 | 13.6646 | 6.1103 | 34.2556 | 6 |
| OD600=0.0075 | 44.9452 | 69.4718 | 30.2983 | 9.7712 | 7.6446 | 31.0109 | 6 |
| OD600=0.005 | 50.9019 | 82.5931 | 39.6122 | 3.1752 | 9.0485 | 17.1382 | 7 |
| OD600=0.005 | 51.0750 | 81.9858 | 37.8603 | 3.8205 | 10.2769 | 16.8287 | 7 |
| OD600=0.005 | 48.3790 | 83.4844 | 35.2498 | 3.0255 | 11.5648 | 15.1812 | 7 |
| OD600=0.005 | 52.6701 | 86.8332 | 38.8307 | 3.7358 | 12.6918 | 14.5058 | 7 |
| OD600=0.005 | 49.1504 | 80.3814 | 36.6072 | 3.1861 | 11.1529 | 17.8730 | 7 |
| OD600=0.005 | 51.3052 | 84.2242 | 39.1512 | 3.5669 | 13.6274 | 18.5685 | 7 |

**Table S8.** Fluorescence response pattern obtained from the Ami-AuNP-DNAs sensoragainst *Pseudomonas aeruginosa* at different concentrations (OD600 from 0.005 to 0.1).

| **Concentration** | **5A-VIC** | **10A-TAMRA** | **20A-Texas Red** | **30A-Cy5** | **40A-Cy5.5** | **50A-Cy7** | **Group** |
| --- | --- | --- | --- | --- | --- | --- | --- |
| OD600=0.1 | 135.5100 | 110.4060 | 87.0637 | 55.1059 | 38.8390 | 69.4651 | 1 |
| OD600=0.1 | 136.1800 | 115.1550 | 88.8260 | 51.6408 | 39.1194 | 67.3534 | 1 |
| OD600=0.1 | 134.9290 | 113.3980 | 86.8089 | 50.9450 | 35.9481 | 68.9434 | 1 |
| OD600=0.1 | 132.8470 | 112.7080 | 82.0265 | 56.2968 | 33.8995 | 64.3937 | 1 |
| OD600=0.1 | 135.7720 | 117.1260 | 83.7675 | 53.3808 | 39.9935 | 66.2735 | 1 |
| OD600=0.1 | 137.4120 | 111.7780 | 86.8185 | 54.4004 | 36.5263 | 63.4596 | 1 |
| OD600=0.075 | 125.0420 | 103.2990 | 75.3684 | 42.0818 | 30.1802 | 56.0501 | 2 |
| OD600=0.075 | 123.5330 | 104.9560 | 78.1258 | 45.5993 | 33.0090 | 55.0927 | 2 |
| OD600=0.075 | 120.6520 | 101.7590 | 77.4766 | 43.2657 | 31.3382 | 57.8335 | 2 |
| OD600=0.075 | 122.7820 | 107.6530 | 75.1224 | 45.4769 | 34.4218 | 54.6324 | 2 |
| OD600=0.075 | 126.4670 | 102.8490 | 76.6497 | 47.9145 | 33.7534 | 55.2039 | 2 |
| OD600=0.075 | 121.9770 | 105.6770 | 74.5099 | 46.0300 | 36.3540 | 52.9360 | 2 |
| OD600=0.05 | 108.8165 | 84.9220 | 54.3136 | 19.2695 | 25.0779 | 45.9207 | 3 |
| OD600=0.05 | 107.5970 | 85.8741 | 55.5094 | 22.9534 | 26.6287 | 43.5164 | 3 |
| OD600=0.05 | 105.0590 | 86.1620 | 52.8843 | 18.8999 | 24.0820 | 44.6987 | 3 |
| OD600=0.05 | 109.9410 | 82.4837 | 56.1241 | 19.4409 | 26.4555 | 41.6439 | 3 |
| OD600=0.05 | 106.8120 | 81.0855 | 53.6735 | 22.2559 | 27.8582 | 44.4197 | 3 |
| OD600=0.05 | 103.9250 | 83.6821 | 54.4627 | 19.1091 | 22.7031 | 42.4505 | 3 |
| OD600=0.025 | 46.8874 | 46.8436 | 65.8328 | 24.2331 | 7.3695 | 25.6401 | 4 |
| OD600=0.025 | 48.1645 | 45.6285 | 67.0903 | 27.3371 | 8.2852 | 22.3968 | 4 |
| OD600=0.025 | 51.3717 | 44.1894 | 66.2652 | 26.3582 | 7.3904 | 23.8044 | 4 |
| OD600=0.025 | 44.3015 | 45.8305 | 68.0414 | 24.2117 | 8.2139 | 24.3959 | 4 |
| OD600=0.025 | 50.0475 | 44.2605 | 67.2186 | 25.2856 | 7.6629 | 26.8635 | 4 |
| OD600=0.025 | 43.8649 | 45.4547 | 64.6847 | 28.1442 | 8.5447 | 23.9772 | 4 |
| OD600=0.01 | 75.0509 | 69.7462 | 49.3087 | 11.7791 | 10.7559 | 7.7451 | 5 |
| OD600=0.01 | 74.0057 | 66.6665 | 44.7389 | 12.1558 | 11.7438 | 6.6134 | 5 |
| OD600=0.01 | 70.4930 | 67.0678 | 48.6267 | 11.4483 | 10.7592 | 7.2343 | 5 |
| OD600=0.01 | 75.5712 | 64.7716 | 44.1092 | 13.6229 | 11.4204 | 8.8390 | 5 |
| OD600=0.01 | 72.6779 | 69.1508 | 46.2023 | 12.3257 | 12.1389 | 6.8802 | 5 |
| OD600=0.01 | 72.4596 | 68.8327 | 47.7322 | 11.7813 | 12.2223 | 7.0169 | 5 |
| OD600=0.0075 | 62.6453 | 37.4703 | 21.6443 | 30.5328 | 22.6686 | 15.6124 | 6 |
| OD600=0.0075 | 60.9305 | 38.7252 | 24.6009 | 33.9823 | 22.4795 | 13.5117 | 6 |
| OD600=0.0075 | 62.7592 | 40.1974 | 25.0365 | 32.4081 | 21.4341 | 12.9916 | 6 |
| OD600=0.0075 | 61.6651 | 36.3570 | 22.9375 | 35.2578 | 21.5016 | 14.9910 | 6 |
| OD600=0.0075 | 63.7834 | 36.9917 | 20.8992 | 31.4078 | 20.6878 | 13.5188 | 6 |
| OD600=0.0075 | 64.9260 | 39.0890 | 26.7318 | 35.4302 | 21.9633 | 15.0250 | 6 |
| OD600=0.005 | 88.8474 | 58.6841 | 32.5285 | 6.2801 | 1.7013 | 32.1232 | 7 |
| OD600=0.005 | 85.4635 | 55.4422 | 34.4661 | 7.0049 | 1.8189 | 35.0043 | 7 |
| OD600=0.005 | 83.9334 | 56.1454 | 33.7393 | 8.5578 | 2.1872 | 30.0136 | 7 |
| OD600=0.005 | 87.6055 | 53.9505 | 36.0506 | 7.5494 | 1.4215 | 31.5280 | 7 |
| OD600=0.005 | 85.0545 | 55.1941 | 34.0901 | 6.7282 | 2.3663 | 34.9137 | 7 |
| OD600=0.005 | 86.8107 | 56.8852 | 35.8271 | 8.1620 | 1.7417 | 30.0915 | 7 |

**Table S9.** The fluorescence response pattern of six DNAs in bacteria isolated from clinical urine samples

| **Number** | **5A-VIC** | **10A-TAMRA** | **20A-Texas Red** | | **30A-Cy5** | **40A-Cy5.5** | **50A-Cy7** |
| --- | --- | --- | --- | --- | --- | --- | --- |
| *E.coli-1* | 18.2117 | 31.5479 | 14.1263 | | 6.4656 | 0.6624 | 12.2706 |
| *E.coli-2* | 19.4688 | 36.3457 | 16.7511 | | 6.3303 | 0.7260 | 9.7597 |
| *E.coli-3* | 26.8622 | 32.2887 | 23.2553 | | 6.6570 | 0.6074 | 12.8005 |
| *E.coli-4* | 19.6383 | 34.3521 | 22.0148 | | 10.4922 | 0.7856 | 9.8898 |
| *E.coli-5* | 23.2031 | 29.2985 | 21.8915 | | 6.5564 | 0.6943 | 9.9848 |
| *E.coli-6* | 20.9084 | 33.5685 | 15.0228 | | 8.3154 | 0.6901 | 12.6902 |
| *E.coli-7* | 25.7742 | 37.1920 | 22.8766 | | 7.8265 | 0.5988 | 12.4999 |
| *E.coli-8* | 23.2987 | 34.0798 | 21.5195 | | 6.3393 | 0.7775 | 13.7938 |
| *E.coli-9* | 22.3037 | 32.8297 | 20.8060 | | 7.0022 | 0.7697 | 10.1797 |
| *E.coli-10* | 21.7119 | 32.7005 | 22.0587 | | 6.1515 | 0.7549 | 13.4566 |
| *E.coli-11* | 24.1798 | 28.8901 | 18.3988 | | 7.0853 | 0.7601 | 13.7324 |
| *E.coli-12* | 26.6620 | 33.6976 | 21.2780 | | 10.9865 | 0.6919 | 12.2727 |
| *E.coli-13* | 18.9184 | 35.6937 | 16.9069 | | 7.7557 | 0.8410 | 9.5655 |
| *E.coli-14* | 20.1450 | 32.6171 | 17.3426 | | 6.7560 | 0.7590 | 12.4509 |
| *E.coli-15* | 23.8343 | 32.1525 | 18.4707 | | 8.1715 | 0.7188 | 13.2621 |
| *E.coli-16* | 21.9553 | 36.9303 | 19.5951 | | 7.9268 | 0.8288 | 10.1044 |
| *E.coli-17* | 18.1443 | 39.5818 | 16.6186 | | 8.7666 | 0.6292 | 12.6060 |
| *E.coli-18* | 22.7331 | 35.7952 | 21.5884 | | 8.5355 | 0.6860 | 12.4678 |
| *E.coli-19* | 23.6293 | 35.2492 | 19.3185 | | 8.3687 | 0.7528 | 10.9897 |
| *E.coli-20* | 22.4430 | 30.1858 | 20.0687 | | 6.8205 | 0.5784 | 10.3217 |
| *E.coli-21* | 21.1938 | 32.6233 | 17.3143 | | 7.7211 | 0.6052 | 10.8195 |
| *E.coli-22* | 25.0649 | 33.0719 | 19.0827 | | 6.7592 | 0.8371 | 9.5506 |
| *E.coli-23* | 25.0585 | 28.0964 | 20.6834 | | 9.0607 | 0.6157 | 12.8453 |
| *E.coli-24* | 21.0187 | 37.8874 | 21.2348 | | 7.9868 | 0.7342 | 12.4812 |
| *E.coli-25* | 26.6938 | 33.6812 | 20.7071 | | 6.7021 | 0.5610 | 10.4510 |
| *E.coli-26* | 24.4033 | 31.7339 | 22.1124 | | 7.2486 | 0.7261 | 9.6714 |
| *E.coli-27* | 20.8033 | 32.7067 | 20.2300 | | 9.1082 | 0.7492 | 10.1324 |
| *E.coli-28* | 24.6242 | 33.0060 | 21.0269 | | 10.8406 | 0.6119 | 9.8405 |
| *E.coli-29* | 25.8953 | 36.9051 | 13.3690 | | 6.4920 | 0.5787 | 10.7450 |
| *E.coli-30* | 24.8777 | 29.7718 | | 20.0984 | 7.5259 | 0.6484 | 9.7381 |
| *E.coli-31* | 20.4411 | 35.1044 | 19.9745 | | 7.4630 | 0.6554 | 11.3970 |
| *E.coli-32* | 27.7925 | 36.3782 | 20.1059 | | 8.5739 | 0.7091 | 12.3193 |
| *E.coli-33* | 18.5258 | 31.1976 | 19.5238 | | 9.4195 | 0.6944 | 9.9110 |
| *E.coli-34* | 24.6997 | 31.0913 | 15.8043 | | 10.2905 | 0.6832 | 9.7051 |
| *E.coli-35* | 19.6866 | 29.0576 | 20.4791 | | 9.8726 | 0.6620 | 10.0220 |
| *E.coli-36* | 18.4001 | 32.2306 | 19.2630 | | 7.6597 | 0.6355 | 12.8671 |
| *E.coli-37* | 15.8067 | 37.8591 | 20.6883 | | 6.2695 | 0.6252 | 9.4903 |
| *E.coli-38* | 20.7730 | 30.3383 | 22.7794 | | 7.0860 | 0.6050 | 10.3418 |
| *E.coli-39* | 26.4874 | 32.4112 | 17.8516 | | 9.3820 | 0.6777 | 12.8177 |
| *E.coli-40* | 22.7083 | 28.5455 | 20.8189 | | 8.6765 | 0.5906 | 12.7517 |
| *E.faecium-1* | 10.6796 | 27.7662 | 25.7555 | | 10.5413 | 2.1078 | 3.0278 |
| *E.faecium-2* | 8.9837 | 27.2548 | 27.2205 | | 8.7986 | 2.0572 | 2.8282 |
| *E.faecium-3* | 8.6036 | 27.5721 | 25.4960 | | 9.1412 | 1.7921 | 2.6270 |
| *E.faecium-4* | 8.0433 | 27.2350 | 27.4302 | | 6.4454 | 1.9348 | 3.5973 |
| *E.faecium-5* | 8.2379 | 25.9283 | 26.9210 | | 8.5633 | 1.6820 | 2.7493 |
| *E.faecium-6* | 9.0902 | 26.9428 | 29.5797 | | 9.8370 | 2.1922 | 5.0216 |
| *E.faecium-7* | 11.1708 | 23.1534 | 26.5404 | | 6.8835 | 1.9418 | 3.4765 |
| *E.faecium-8* | 6.7039 | 28.1332 | 30.0383 | | 7.4391 | 1.9546 | 2.5759 |
| *E.faecium-9* | 7.4236 | 30.7217 | 30.1697 | | 7.8612 | 2.1256 | 3.3779 |
| *E.faecium-10* | 9.4225 | 27.1403 | 28.4595 | | 6.6190 | 2.3721 | 3.7605 |
| *E.faecium-11* | 12.9450 | 36.8954 | 27.3294 | | 5.9998 | 1.5827 | 3.8986 |
| *E.faecium-12* | 8.4599 | 29.8335 | 28.1936 | | 5.5376 | 1.9408 | 4.6620 |
| *E.faecium-13* | 8.6317 | 26.3447 | 28.2719 | | 9.6274 | 1.9165 | 5.0618 |
| *E.faecium-14* | 9.8603 | 31.1682 | 28.4406 | | 8.5854 | 2.5348 | 4.0603 |
| *E.faecium-15* | 10.7433 | 28.1488 | 28.0495 | | 8.8287 | 2.1191 | 4.9760 |
| *E.faecium-16* | 7.2052 | 28.6793 | 29.7487 | | 6.2499 | 1.8680 | 3.5617 |
| *E.faecium-17* | 9.6521 | 26.5049 | 29.8556 | | 6.9727 | 1.8595 | 3.2904 |
| *E.faecium-18* | 7.2342 | 34.4556 | 29.9075 | | 7.6553 | 1.8974 | 4.2963 |
| *E.faecium-19* | 8.6231 | 27.7141 | 29.3146 | | 9.9138 | 2.1523 | 5.3128 |
| *E.faecium-20* | 8.2766 | 25.8376 | 30.7746 | | 10.9135 | 2.2058 | 3.8089 |
| *E.faecium-21* | 7.9299 | 27.0134 | 29.5266 | | 8.5513 | 2.6230 | 5.5275 |
| *E.faecium-22* | 8.6238 | 34.7830 | 26.2626 | | 7.2394 | 1.6437 | 2.4002 |
| *E.faecium-23* | 11.5248 | 26.7162 | 28.2404 | | 9.2663 | 2.5018 | 3.3780 |
| *E.faecium-24* | 9.4367 | 32.4173 | 27.6968 | | 9.0355 | 2.0258 | 3.7739 |
| *E.faecium-25* | 8.6555 | 33.9950 | 26.1552 | | 8.9229 | 1.7589 | 3.4916 |
| *E.faecium-26* | 12.5126 | 25.3373 | 28.8778 | | 9.7744 | 1.9928 | 5.2702 |
| *E.faecium-27* | 12.6560 | 24.8007 | 29.4526 | | 7.3886 | 1.8939 | 5.5298 |
| *E.faecium-28* | 7.2044 | 25.5980 | 30.2506 | | 6.1679 | 2.0266 | 3.5481 |
| *E.faecium-29* | 8.0523 | 27.1809 | 30.8667 | | 8.5467 | 2.5526 | 4.1364 |
| *E.faecium-30* | 8.7936 | 36.0255 | 28.1867 | | 7.9019 | 1.7526 | 2.9125 |
| *E.faecium-31* | 7.3971 | 38.8659 | 27.2493 | | 6.4366 | 2.1081 | 3.1595 |
| *E.faecium-32* | 12.6985 | 32.1327 | 28.6352 | | 7.9014 | 1.9006 | 5.3011 |
| *E.faecium-33* | 7.4025 | 31.8643 | 29.0130 | | 10.5593 | 2.2641 | 4.3392 |
| *E.faecium-34* | 10.1499 | 33.7041 | 27.9158 | | 7.9853 | 2.3351 | 4.1156 |
| *E.faecium-35* | 8.2351 | 27.6910 | 29.9034 | | 9.5785 | 1.8041 | 4.6679 |
| *E.faecium-36* | 9.5405 | 24.0739 | 27.7125 | | 5.6682 | 2.2661 | 3.7181 |
| *E.faecium-37* | 8.3185 | 26.8574 | 26.8247 | | 7.1182 | 1.9151 | 4.0136 |
| *E.faecium-38* | 9.5167 | 30.6240 | 30.2153 | | 9.9930 | 1.9775 | 4.1829 |
| *E.faecium-39* | 9.4028 | 25.2332 | 28.7065 | | 9.4605 | 2.4056 | 3.9786 |
| *E.faecium-40* | 8.3849 | 34.7022 | 27.4468 | | 7.0773 | 2.1781 | 3.5649 |
| *K.pneumoniae-1* | 16.1978 | 13.8038 | 51.7726 | | 5.8362 | 0.7618 | 17.8187 |
| *K.pneumoniae-2* | 18.5827 | 15.7239 | 52.5425 | | 5.0312 | 0.7002 | 20.2566 |
| *K.pneumoniae-3* | 17.0116 | 11.9509 | 59.3670 | | 4.7031 | 0.8651 | 22.7843 |
| *K.pneumoniae-4* | 21.1574 | 12.3066 | 57.4920 | | 6.5015 | 0.8406 | 19.1843 |
| *K.pneumoniae-5* | 19.4937 | 15.8655 | 53.4484 | | 5.3287 | 0.8200 | 18.0815 |
| *K.pneumoniae-6* | 17.1670 | 11.9807 | 60.8278 | | 3.6305 | 0.8173 | 21.7324 |
| *K.pneumoniae-7* | 13.7807 | 11.0121 | 57.6044 | | 6.7831 | 0.7348 | 20.1232 |
| *K.pneumoniae-8* | 14.8792 | 13.0850 | 52.1748 | | 4.7273 | 0.9181 | 22.1153 |
| *K.pneumoniae-9* | 13.6932 | 12.1116 | 56.1480 | | 5.3024 | 0.8301 | 17.2507 |
| *K.pneumoniae-10* | 19.5200 | 16.4146 | 55.7026 | | 4.4671 | 0.8892 | 21.1933 |
| *K.pneumoniae-11* | 16.0509 | 13.0134 | 58.0824 | | 5.1401 | 0.8085 | 20.9571 |
| *K.pneumoniae-12* | 19.1673 | 12.9644 | 55.4451 | | 4.0134 | 0.8074 | 18.3153 |
| *K.pneumoniae-13* | 13.6092 | 13.5104 | 56.7070 | | 3.7365 | 0.7186 | 19.4867 |
| *K.pneumoniae-14* | 19.7271 | 12.5390 | 53.9074 | | 4.4332 | 0.6662 | 19.0114 |
| *K.pneumoniae-15* | 15.7815 | 11.4846 | 55.5620 | | 6.0084 | 0.8474 | 19.1403 |
| *K.pneumoniae-16* | 17.3627 | 10.7395 | 56.0803 | | 4.4940 | 0.7784 | 22.1102 |
| *K.pneumoniae-17* | 21.0568 | 12.5524 | 50.7808 | | 4.5623 | 0.9309 | 18.7777 |
| *K.pneumoniae-18* | 21.3776 | 15.3975 | 55.1346 | | 4.7097 | 0.7938 | 18.5369 |
| *K.pneumoniae-19* | 22.7940 | 12.8081 | 53.6412 | | 4.5360 | 0.7294 | 18.7549 |
| *K.pneumoniae-20* | 18.4121 | 10.7203 | 55.8186 | | 6.1846 | 0.9378 | 22.8103 |
| *K.pneumoniae-21* | 15.6539 | 13.4150 | 50.8867 | | 5.8741 | 0.7136 | 21.1947 |
| *K.pneumoniae-22* | 18.6861 | 11.9508 | 52.2393 | | 5.8136 | 0.9124 | 19.6305 |
| *K.pneumoniae-23* | 17.2556 | 13.7296 | 54.4762 | | 4.8469 | 0.8998 | 20.9337 |
| *K.pneumoniae-24* | 18.4686 | 11.6327 | 51.4550 | | 6.0630 | 0.7946 | 21.0180 |
| *K.pneumoniae-25* | 21.2564 | 13.0440 | 56.3895 | | 6.0372 | 0.8735 | 21.2818 |
| *K.pneumoniae-26* | 15.1313 | 11.5376 | 54.9348 | | 4.1614 | 0.8107 | 22.5171 |
| *K.pneumoniae-27* | 16.0798 | 12.9340 | 54.8387 | | 4.8803 | 0.7695 | 19.8697 |
| *K.pneumoniae-28* | 20.1140 | 12.8717 | 52.6594 | | 5.6270 | 0.7424 | 22.5265 |
| *K.pneumoniae-29* | 22.2702 | 11.7225 | 60.0142 | | 5.0239 | 0.7949 | 22.5000 |
| *K.pneumoniae-30* | 16.2521 | 13.0050 | 56.7642 | | 6.0879 | 0.8694 | 21.4773 |
| *K.pneumoniae-31* | 19.1307 | 13.0851 | 51.6360 | | 4.4810 | 0.7558 | 21.2048 |
| *K.pneumoniae-32* | 14.0864 | 13.1608 | 53.5673 | | 3.5073 | 0.8755 | 21.6438 |
| *K.pneumoniae-33* | 14.0386 | 12.3934 | 56.2438 | | 5.7584 | 0.8521 | 23.1352 |
| *K.pneumoniae-34* | 20.1927 | 15.8541 | 57.5104 | | 3.6103 | 0.8127 | 19.7855 |
| *K.pneumoniae-35* | 22.0321 | 11.2783 | 57.0001 | | 4.8175 | 0.9227 | 18.8324 |
| *K.pneumoniae-36* | 20.4165 | 11.9861 | 58.9871 | | 4.3078 | 0.8666 | 20.7442 |
| *K.pneumoniae-37* | 20.5899 | 11.8277 | 56.7929 | | 5.6569 | 0.7949 | 19.9228 |
| *K.pneumoniae-38* | 19.7203 | 17.8864 | 59.9630 | | 4.5044 | 0.6885 | 18.6486 |
| *K.pneumoniae-39* | 19.1522 | 16.2536 | 59.4095 | | 4.4490 | 0.8169 | 19.2188 |
| *K.pneumoniae-40* | 19.3924 | 14.6902 | 60.3402 | | 5.9863 | 0.7680 | 21.2196 |
| *E.faecalis-1* | 24.4636 | 20.2280 | 8.7407 | | 23.4527 | 0.2434 | 16.1015 |
| *E.faecalis-2* | 36.1833 | 19.7526 | 7.8812 | | 20.6464 | 0.3014 | 14.2373 |
| *E.faecalis-3* | 31.4987 | 17.6240 | 8.1504 | | 18.7853 | 0.2447 | 17.2021 |
| *E.faecalis-4* | 26.4351 | 17.2266 | 8.2923 | | 17.9843 | 0.2738 | 17.5997 |
| *E.faecalis-5* | 24.0047 | 15.9063 | 8.5167 | | 18.0527 | 0.2438 | 14.9635 |
| *E.faecalis-6* | 25.0202 | 17.4608 | 9.7343 | | 16.9936 | 0.2755 | 15.3630 |
| *E.faecalis-7* | 20.7589 | 17.0949 | 8.5977 | | 18.2632 | 0.2528 | 13.3439 |
| *E.faecalis-8* | 35.4394 | 19.3946 | 8.5724 | | 20.3852 | 0.2201 | 15.8313 |
| *E.faecalis-9* | 19.1032 | 16.4548 | 6.8609 | | 19.3485 | 0.2438 | 17.6521 |
| *E.faecalis-10* | 32.6854 | 21.0047 | 7.9635 | | 20.9152 | 0.2566 | 14.8636 |
| *E.faecalis-11* | 34.2174 | 22.4806 | 7.4229 | | 19.2882 | 0.2327 | 14.0375 |
| *E.faecalis-12* | 26.8710 | 16.2381 | 8.4815 | | 24.2815 | 0.2312 | 17.5874 |
| *E.faecalis-13* | 23.3824 | 20.8951 | 8.2599 | | 20.8719 | 0.2532 | 17.4348 |
| *E.faecalis-14* | 31.2909 | 15.5306 | 7.9520 | | 18.9540 | 0.2069 | 14.0426 |
| *E.faecalis-15* | 23.7251 | 21.6847 | 9.2171 | | 19.5136 | 0.2266 | 14.2913 |
| *E.faecalis-16* | 25.6582 | 16.3477 | 7.9227 | | 25.4014 | 0.2566 | 17.0913 |
| *E.faecalis-17* | 23.6290 | 18.5802 | 9.3209 | | 22.8630 | 0.2625 | 14.8671 |
| *E.faecalis-18* | 27.7376 | 21.3784 | 8.7534 | | 20.1103 | 0.2203 | 16.5966 |
| *E.faecalis-19* | 29.1451 | 20.2147 | 7.1639 | | 21.3408 | 0.2428 | 15.1750 |
| *E.faecalis-20* | 20.7835 | 19.4796 | 6.4121 | | 21.0955 | 0.2219 | 17.2145 |
| *E.faecalis-21* | 31.9203 | 16.8204 | 8.0946 | | 24.8835 | 0.2549 | 14.2126 |
| *E.faecalis-22* | 27.2052 | 16.3187 | 7.5605 | | 19.6525 | 0.2649 | 16.8737 |
| *E.faecalis-23* | 28.3670 | 21.9195 | 8.4448 | | 23.8664 | 0.2070 | 14.5578 |
| *E.faecalis-24* | 22.9196 | 19.0156 | 7.5801 | | 24.7690 | 0.2310 | 13.0047 |
| *E.faecalis-25* | 28.8464 | 21.2947 | 8.1896 | | 23.2411 | 0.2739 | 13.5631 |
| *E.faecalis-26* | 30.7697 | 17.9048 | 8.1862 | | 23.9021 | 0.2474 | 15.6249 |
| *E.faecalis-27* | 27.8744 | 17.7849 | 8.9424 | | 21.6365 | 0.1459 | 13.5047 |
| *E.faecalis-28* | 25.6037 | 18.2380 | 7.8117 | | 22.3083 | 0.2498 | 16.1311 |
| *E.faecalis-29* | 24.9818 | 20.0094 | 9.2006 | | 25.0681 | 0.2334 | 15.2930 |
| *E.faecalis-30* | 22.4780 | 20.1849 | 8.2190 | | 21.5934 | 0.2191 | 17.8632 |
| *E.faecalis-31* | 23.0174 | 16.8765 | 7.2832 | | 19.6969 | 0.2478 | 16.5715 |
| *E.faecalis-32* | 29.0054 | 19.6656 | 8.8717 | | 21.8597 | 0.2839 | 13.7621 |
| *E.faecalis-33* | 31.5021 | 23.2694 | 8.9569 | | 21.1556 | 0.2363 | 17.4334 |
| *E.faecalis-34* | 32.0945 | 17.3349 | 8.2642 | | 23.1688 | 0.2885 | 16.1296 |
| *E.faecalis-35* | 36.3484 | 18.1161 | 7.3907 | | 22.6833 | 0.2445 | 13.4570 |
| *E.faecalis-36* | 31.7576 | 19.5108 | 8.6555 | | 18.9594 | 0.2242 | 13.8648 |
| *E.faecalis-37* | 34.1949 | 20.6882 | 9.0371 | | 23.1366 | 0.2778 | 15.2078 |
| *E.faecalis-38* | 28.3317 | 20.1083 | 7.1771 | | 25.5635 | 0.2517 | 18.1084 |
| *E.faecalis-39* | 38.5056 | 17.8492 | 8.8905 | | 22.9491 | 0.2764 | 15.5523 |
| *E.faecalis-40* | 31.2435 | 21.7106 | 9.0044 | | 22.9288 | 0.2578 | 16.4632 |
| *P.aeruginosa-1* | 47.1741 | 67.2487 | 33.0596 | | 11.1792 | 1.7393 | 17.7514 |
| *P.aeruginosa-2* | 46.0115 | 63.5560 | 38.8218 | | 9.2099 | 1.5238 | 12.5738 |
| *P.aeruginosa-3* | 48.5208 | 67.9954 | 37.8235 | | 9.8213 | 1.5623 | 14.8054 |
| *P.aeruginosa-4* | 49.2872 | 70.6246 | 35.0279 | | 9.4380 | 1.7958 | 11.4644 |
| *P.aeruginosa-5* | 43.4537 | 66.6613 | 31.5535 | | 10.6987 | 1.6978 | 20.1306 |
| *P.aeruginosa-6* | 49.5952 | 60.9246 | 33.1366 | | 7.9624 | 1.8617 | 14.3558 |
| *P.aeruginosa-7* | 48.0985 | 71.5126 | 36.8717 | | 11.5890 | 1.5068 | 17.7066 |
| *P.aeruginosa-8* | 49.1553 | 72.8267 | 34.7054 | | 7.9071 | 1.4923 | 16.4035 |
| *P.aeruginosa-9* | 46.8735 | 63.2682 | 36.6842 | | 8.6117 | 1.4623 | 15.2247 |
| *P.aeruginosa-10* | 47.8759 | 69.6881 | 38.1895 | | 8.7225 | 1.4620 | 10.5974 |
| *P.aeruginosa-11* | 53.8756 | 62.4648 | 38.9613 | | 8.5765 | 1.8832 | 20.0753 |
| *P.aeruginosa-12* | 51.9820 | 63.4880 | 30.0736 | | 9.5083 | 1.6461 | 10.7466 |
| *P.aeruginosa-13* | 52.8026 | 59.2295 | 37.0929 | | 9.7568 | 1.5983 | 13.6526 |
| *P.aeruginosa-14* | 46.1475 | 61.7169 | 34.3473 | | 11.8222 | 1.6634 | 13.9250 |
| *P.aeruginosa-15* | 52.6328 | 62.5116 | 35.3669 | | 11.6656 | 1.7975 | 11.0939 |
| *P.aeruginosa-16* | 46.5137 | 67.2529 | 29.4723 | | 8.2299 | 1.6315 | 10.9629 |
| *P.aeruginosa-17* | 46.0974 | 67.9624 | 31.9464 | | 8.3755 | 1.4237 | 11.0734 |
| *P.aeruginosa-18* | 46.8251 | 63.9369 | 29.7908 | | 8.8405 | 1.8369 | 19.7671 |
| *P.aeruginosa-19* | 48.6998 | 68.3242 | 29.7725 | | 11.4109 | 1.5046 | 14.0823 |
| *P.aeruginosa-20* | 50.9515 | 52.2593 | 30.2745 | | 8.4420 | 1.8436 | 18.3093 |
| *P.aeruginosa-21* | 51.4091 | 66.6362 | 34.1330 | | 10.2884 | 2.0254 | 10.7316 |
| *P.aeruginosa-22* | 49.8443 | 59.2641 | 33.7066 | | 8.4160 | 1.6548 | 14.0335 |
| *P.aeruginosa-23* | 50.8424 | 64.1901 | 30.8203 | | 9.6176 | 1.7753 | 16.7696 |
| *P.aeruginosa-24* | 51.1344 | 62.3496 | 37.2594 | | 12.9678 | 1.9087 | 14.8310 |
| *P.aeruginosa-25* | 47.5575 | 61.8242 | 35.4073 | | 10.5324 | 1.7164 | 19.2422 |
| *P.aeruginosa-26* | 46.5360 | 65.2846 | 32.3870 | | 9.1346 | 1.5245 | 17.4224 |
| *P.aeruginosa-27* | 48.4059 | 61.0061 | 33.4727 | | 11.0884 | 1.7046 | 15.8401 |
| *P.aeruginosa-28* | 43.3470 | 60.6523 | 40.8576 | | 8.6810 | 1.9075 | 19.1304 |
| *P.aeruginosa-29* | 47.0315 | 66.8350 | 31.0970 | | 10.8102 | 1.7569 | 17.0915 |
| *P.aeruginosa-30* | 48.2828 | 64.5527 | 36.1072 | | 11.3452 | 1.8428 | 12.9689 |
| *P.aeruginosa-31* | 56.2985 | 60.7224 | 36.0612 | | 9.3381 | 1.7503 | 12.5855 |
| *P.aeruginosa-32* | 52.3166 | 71.1321 | 34.1682 | | 10.3078 | 1.8782 | 15.7270 |
| *P.aeruginosa-33* | 46.6064 | 59.7979 | 38.9076 | | 9.3676 | 1.5903 | 17.4176 |
| *P.aeruginosa-34* | 50.2736 | 60.6715 | 33.4319 | | 9.7946 | 1.6585 | 18.7892 |
| *P.aeruginosa-35* | 47.6405 | 71.7161 | 39.0324 | | 8.9650 | 1.5233 | 17.0540 |
| *P.aeruginosa-36* | 47.5740 | 68.9987 | 38.3031 | | 9.9510 | 1.9295 | 13.0571 |
| *P.aeruginosa-37* | 55.1191 | 61.3950 | 37.1958 | | 10.4505 | 1.8575 | 12.2664 |
| *P.aeruginosa-38* | 47.0333 | 62.4627 | 35.0901 | | 9.2654 | 1.5338 | 15.1108 |
| *P.aeruginosa-39* | 50.7411 | 64.0889 | 30.9429 | | 9.7446 | 1.8383 | 18.2627 |
| *P.aeruginosa-40* | 50.4315 | 61.8811 | 34.3632 | | 11.0721 | 1.5850 | 16.8914 |

**Table S10.** Classification results and model performance of five kinds of bacteria isolated from clinical urine samples

| **Actual categories** | **Prediction results** | | | | | **Accuracy** | **Precision** | **Sensitivity** | **Specificity** |
| --- | --- | --- | --- | --- | --- | --- | --- | --- | --- |
| *E.*  *coli* | *E.*  *faecium* | *K.pneum-oniae* | *E.*  *faecalis* | *P.*  *aeruginosa* |
| *E.coli* | 40 | 0 | 0 | 0 | 0 | 100% | 1.00 | 1.00 | 1.00 |
| *E.faecium* | 0 | 40 | 0 | 0 | 0 |
| *K.pneumoniae* | 0 | 0 | 40 | 0 | 0 |
| *E.faecalis* | 0 | 0 | 0 | 40 | 0 |
| *P.aeruginosa* | 0 | 0 | 0 | 0 | 40 |  |  |  |  |
